# Supplementary material for: Solanesol Mediated SIRT-1 Signaling Activation Prevents Neurobehavioral and Neurochemical Defects in Ouabain-induced Experimental Model of Bipolar Disorder in Rats
Source: Research Square preprint supplement (doi:10.21203/rs.3.rs-735926/v1), 2021-08-02
Supplement: Supplementary file 1 [file 88130760f7ea67c996f5f57d.xlsx]

## Sheet: FST
	Vehicle control						Sham control						SNL80 perse						OUA						OUA + SNL40						OUA + SNL80						OUA + Li60						OUA + SNL80 + Li60
Day 1	45	49	48	46	47	47	46	49	46	48	47	45	47	48	46	49	45	47	47	49	46	48	45	49	48	45	49	47	46	46	45	47	49	48	46	47	49	45	47	46	46	45	45	45	49	47	48	47
Day 9	48	46	49	47	45	46	47	48	45	46	45	49	45	46	48	49	47	46	77	75	79	76	75	78	76	74	74	77	75	76	75	77	75	76	77	75	76	75	74	77	75	74	77	75	74	76	76	75
Day 18	46	48	47	49	45	48	46	45	49	47	48	45	47	45	46	48	49	47	85	84	87	86	87	85	74	71	73	72	71	73	69	71	70	70	72	72	67	65	65	68	66	66	64	64	64	64	63	66
Day 27	49	45	47	46	48	46	47	47	45	48	46	49	45	48	49	49	46	47	99	97	95	98	100	98	67	69	70	68	67	70	63	65	64	63	64	62	57	56	57	56	58	59	55	55	52	54	55	54
	Vehicle control	Sham control	SNL80 perse	OUA	OUA + SNL40	OUA + SNL80	OUA + Li60	OUA + SNL80 + Li60
Number of values	4	4	4	4	4	4	4	4
Minimum	46.83	46.67	46.83	47.33	46.83	47	46.33	46.83
25% Percentile	46.83	46.67	46.88	54.67	52.25	51.13	49.04	48.67
Median	46.92	46.75	47	81.17	70.42	67.08	61.67	59.17
75% Percentile	47.13	46.96	47.25	94.79	74.58	74.54	72.92	72.67
Maximum	47.17	47	47.33	97.83	75.33	75.83	75.17	75.5
Mean	46.96	46.79	47.04	76.88	65.75	64.25	61.21	60.17
Std. Deviation	0.1596	0.1596	0.2097	21.52	12.92	12.56	12.34	12.45
Std. Error	0.07979	0.07979	0.1049	10.76	6.459	6.281	6.171	6.224
Lower 95% CI of mean	46.7	46.54	46.71	42.63	45.2	44.26	41.57	40.36
Upper 95% CI of mean	47.21	47.05	47.38	111.1	86.3	84.24	80.85	79.97
KS normality test
KS distance	N too small	N too small	N too small	N too small	N too small	N too small	N too small	N too small
P value
Passed normality test (alpha=0.05)?
P value summary
Sum	187.8	187.2	188.2	307.5	263	257	244.8	240.7
Parameter
Table Analyzed	Data 1
Two-way RM ANOVA	Matching by cols
Source of Variation	% of total variation	P value
Interaction	25.97	< 0.0001
Time	23.25	< 0.0001
Treatment	50.02	< 0.0001
Subjects (matching)	0.1599	0.803
Source of Variation	P value summary	Significant?
Interaction	***	Yes
Time	***	Yes
Treatment	***	Yes
Subjects (matching)	ns	No
Source of Variation	Df	Sum-of-squares	Mean square	F
Interaction	21	10400	495.3	244.1
Time	3	9312	3104	1530
Treatment	7	20040	2862	1788
Subjects (matching)	40	64.04	1.601	0.7891
Residual	120	243.5	2.029
Number of missing values	0
Bonferroni posttests
Vehicle control vs Sham control
Treatment	Vehicle control	Sham control	Difference	95% CI of diff.
Day 1	47	46.83	-0.1667	-3.036 to 2.703
Day 9	46.83	46.67	-0.1667	-3.036 to 2.703
Day 18	47.17	46.67	-0.5	-3.370 to 2.370
Day 27	46.83	47	0.1667	-2.703 to 3.036
Treatment	Difference	t	P value	Summary
Day 1	-0.1667	0.2082	P > 0.05	ns
Day 9	-0.1667	0.2082	P > 0.05	ns
Day 18	-0.5	0.6247	P > 0.05	ns
Day 27	0.1667	0.2082	P > 0.05	ns
Vehicle control vs SNL80 perse
Treatment	Vehicle control	SNL80 perse	Difference	95% CI of diff.
Day 1	47	47	0	-2.870 to 2.870
Day 9	46.83	46.83	0	-2.870 to 2.870
Day 18	47.17	47	-0.1667	-3.036 to 2.703
Day 27	46.83	47.33	0.5	-2.370 to 3.370
Treatment	Difference	t	P value	Summary
Day 1	0	0	P > 0.05	ns
Day 9	0	0	P > 0.05	ns
Day 18	-0.1667	0.2082	P > 0.05	ns
Day 27	0.5	0.6247	P > 0.05	ns
Vehicle control vs OUA
Treatment	Vehicle control	OUA	Difference	95% CI of diff.
Day 1	47	47.33	0.3333	-2.536 to 3.203
Day 9	46.83	76.67	29.83	26.96 to 32.70
Day 18	47.17	85.67	38.5	35.63 to 41.37
Day 27	46.83	97.83	51	48.13 to 53.87
Treatment	Difference	t	P value	Summary
Day 1	0.3333	0.4165	P > 0.05	ns
Day 9	29.83	37.27	P<0.001	***
Day 18	38.5	48.1	P<0.001	***
Day 27	51	63.72	P<0.001	***
Vehicle control vs OUA + SNL40
Treatment	Vehicle control	OUA + SNL40	Difference	95% CI of diff.
Day 1	47	46.83	-0.1667	-3.036 to 2.703
Day 9	46.83	75.33	28.5	25.63 to 31.37
Day 18	47.17	72.33	25.17	22.30 to 28.04
Day 27	46.83	68.5	21.67	18.80 to 24.54
Treatment	Difference	t	P value	Summary
Day 1	-0.1667	0.2082	P > 0.05	ns
Day 9	28.5	35.61	P<0.001	***
Day 18	25.17	31.44	P<0.001	***
Day 27	21.67	27.07	P<0.001	***
Vehicle control vs OUA + SNL80
Treatment	Vehicle control	OUA + SNL80	Difference	95% CI of diff.
Day 1	47	47	0	-2.870 to 2.870
Day 9	46.83	75.83	29	26.13 to 31.87
Day 18	47.17	70.67	23.5	20.63 to 26.37
Day 27	46.83	63.5	16.67	13.80 to 19.54
Treatment	Difference	t	P value	Summary
Day 1	0	0	P > 0.05	ns
Day 9	29	36.23	P<0.001	***
Day 18	23.5	29.36	P<0.001	***
Day 27	16.67	20.82	P<0.001	***
Vehicle control vs OUA + Li60
Treatment	Vehicle control	OUA + Li60	Difference	95% CI of diff.
Day 1	47	46.33	-0.6667	-3.536 to 2.203
Day 9	46.83	75.17	28.33	25.46 to 31.20
Day 18	47.17	66.17	19	16.13 to 21.87
Day 27	46.83	57.17	10.33	7.464 to 13.20
Treatment	Difference	t	P value	Summary
Day 1	-0.6667	0.8329	P > 0.05	ns
Day 9	28.33	35.4	P<0.001	***
Day 18	19	23.74	P<0.001	***
Day 27	10.33	12.91	P<0.001	***
Vehicle control vs OUA + SNL80 + Li60
Treatment	Vehicle control	OUA + SNL80 + Li60	Difference	95% CI of diff.
Day 1	47	46.83	-0.1667	-3.036 to 2.703
Day 9	46.83	75.5	28.67	25.80 to 31.54
Day 18	47.17	64.17	17	14.13 to 19.87
Day 27	46.83	54.17	7.333	4.464 to 10.20
Treatment	Difference	t	P value	Summary
Day 1	-0.1667	0.2082	P > 0.05	ns
Day 9	28.67	35.82	P<0.001	***
Day 18	17	21.24	P<0.001	***
Day 27	7.333	9.162	P<0.001	***
Sham control vs SNL80 perse
Treatment	Sham control	SNL80 perse	Difference	95% CI of diff.
Day 1	46.83	47	0.1667	-2.703 to 3.036
Day 9	46.67	46.83	0.1667	-2.703 to 3.036
Day 18	46.67	47	0.3333	-2.536 to 3.203
Day 27	47	47.33	0.3333	-2.536 to 3.203
Treatment	Difference	t	P value	Summary
Day 1	0.1667	0.2082	P > 0.05	ns
Day 9	0.1667	0.2082	P > 0.05	ns
Day 18	0.3333	0.4165	P > 0.05	ns
Day 27	0.3333	0.4165	P > 0.05	ns
Sham control vs OUA
Treatment	Sham control	OUA	Difference	95% CI of diff.
Day 1	46.83	47.33	0.5	-2.370 to 3.370
Day 9	46.67	76.67	30	27.13 to 32.87
Day 18	46.67	85.67	39	36.13 to 41.87
Day 27	47	97.83	50.83	47.96 to 53.70
Treatment	Difference	t	P value	Summary
Day 1	0.5	0.6247	P > 0.05	ns
Day 9	30	37.48	P<0.001	***
Day 18	39	48.73	P<0.001	***
Day 27	50.83	63.51	P<0.001	***
Sham control vs OUA + SNL40
Treatment	Sham control	OUA + SNL40	Difference	95% CI of diff.
Day 1	46.83	46.83	0	-2.870 to 2.870
Day 9	46.67	75.33	28.67	25.80 to 31.54
Day 18	46.67	72.33	25.67	22.80 to 28.54
Day 27	47	68.5	21.5	18.63 to 24.37
Treatment	Difference	t	P value	Summary
Day 1	0	0	P > 0.05	ns
Day 9	28.67	35.82	P<0.001	***
Day 18	25.67	32.07	P<0.001	***
Day 27	21.5	26.86	P<0.001	***
Sham control vs OUA + SNL80
Treatment	Sham control	OUA + SNL80	Difference	95% CI of diff.
Day 1	46.83	47	0.1667	-2.703 to 3.036
Day 9	46.67	75.83	29.17	26.30 to 32.04
Day 18	46.67	70.67	24	21.13 to 26.87
Day 27	47	63.5	16.5	13.63 to 19.37
Treatment	Difference	t	P value	Summary
Day 1	0.1667	0.2082	P > 0.05	ns
Day 9	29.17	36.44	P<0.001	***
Day 18	24	29.99	P<0.001	***
Day 27	16.5	20.61	P<0.001	***
Sham control vs OUA + Li60
Treatment	Sham control	OUA + Li60	Difference	95% CI of diff.
Day 1	46.83	46.33	-0.5	-3.370 to 2.370
Day 9	46.67	75.17	28.5	25.63 to 31.37
Day 18	46.67	66.17	19.5	16.63 to 22.37
Day 27	47	57.17	10.17	7.297 to 13.04
Treatment	Difference	t	P value	Summary
Day 1	-0.5	0.6247	P > 0.05	ns
Day 9	28.5	35.61	P<0.001	***
Day 18	19.5	24.36	P<0.001	***
Day 27	10.17	12.7	P<0.001	***
Sham control vs OUA + SNL80 + Li60
Treatment	Sham control	OUA + SNL80 + Li60	Difference	95% CI of diff.
Day 1	46.83	46.83	0	-2.870 to 2.870
Day 9	46.67	75.5	28.83	25.96 to 31.70
Day 18	46.67	64.17	17.5	14.63 to 20.37
Day 27	47	54.17	7.167	4.297 to 10.04
Treatment	Difference	t	P value	Summary
Day 1	0	0	P > 0.05	ns
Day 9	28.83	36.02	P<0.001	***
Day 18	17.5	21.86	P<0.001	***
Day 27	7.167	8.954	P<0.001	***
SNL80 perse vs OUA
Treatment	SNL80 perse	OUA	Difference	95% CI of diff.
Day 1	47	47.33	0.3333	-2.536 to 3.203
Day 9	46.83	76.67	29.83	26.96 to 32.70
Day 18	47	85.67	38.67	35.80 to 41.54
Day 27	47.33	97.83	50.5	47.63 to 53.37
Treatment	Difference	t	P value	Summary
Day 1	0.3333	0.4165	P > 0.05	ns
Day 9	29.83	37.27	P<0.001	***
Day 18	38.67	48.31	P<0.001	***
Day 27	50.5	63.09	P<0.001	***
SNL80 perse vs OUA + SNL40
Treatment	SNL80 perse	OUA + SNL40	Difference	95% CI of diff.
Day 1	47	46.83	-0.1667	-3.036 to 2.703
Day 9	46.83	75.33	28.5	25.63 to 31.37
Day 18	47	72.33	25.33	22.46 to 28.20
Day 27	47.33	68.5	21.17	18.30 to 24.04
Treatment	Difference	t	P value	Summary
Day 1	-0.1667	0.2082	P > 0.05	ns
Day 9	28.5	35.61	P<0.001	***
Day 18	25.33	31.65	P<0.001	***
Day 27	21.17	26.45	P<0.001	***
SNL80 perse vs OUA + SNL80
Treatment	SNL80 perse	OUA + SNL80	Difference	95% CI of diff.
Day 1	47	47	0	-2.870 to 2.870
Day 9	46.83	75.83	29	26.13 to 31.87
Day 18	47	70.67	23.67	20.80 to 26.54
Day 27	47.33	63.5	16.17	13.30 to 19.04
Treatment	Difference	t	P value	Summary
Day 1	0	0	P > 0.05	ns
Day 9	29	36.23	P<0.001	***
Day 18	23.67	29.57	P<0.001	***
Day 27	16.17	20.2	P<0.001	***
SNL80 perse vs OUA + Li60
Treatment	SNL80 perse	OUA + Li60	Difference	95% CI of diff.
Day 1	47	46.33	-0.6667	-3.536 to 2.203
Day 9	46.83	75.17	28.33	25.46 to 31.20
Day 18	47	66.17	19.17	16.30 to 22.04
Day 27	47.33	57.17	9.833	6.964 to 12.70
Treatment	Difference	t	P value	Summary
Day 1	-0.6667	0.8329	P > 0.05	ns
Day 9	28.33	35.4	P<0.001	***
Day 18	19.17	23.95	P<0.001	***
Day 27	9.833	12.29	P<0.001	***
SNL80 perse vs OUA + SNL80 + Li60
Treatment	SNL80 perse	OUA + SNL80 + Li60	Difference	95% CI of diff.
Day 1	47	46.83	-0.1667	-3.036 to 2.703
Day 9	46.83	75.5	28.67	25.80 to 31.54
Day 18	47	64.17	17.17	14.30 to 20.04
Day 27	47.33	54.17	6.833	3.964 to 9.703
Treatment	Difference	t	P value	Summary
Day 1	-0.1667	0.2082	P > 0.05	ns
Day 9	28.67	35.82	P<0.001	***
Day 18	17.17	21.45	P<0.001	***
Day 27	6.833	8.538	P<0.001	***
OUA vs OUA + SNL40
Treatment	OUA	OUA + SNL40	Difference	95% CI of diff.
Day 1	47.33	46.83	-0.5	-3.370 to 2.370
Day 9	76.67	75.33	-1.333	-4.203 to 1.536
Day 18	85.67	72.33	-13.33	-16.20 to -10.46
Day 27	97.83	68.5	-29.33	-32.20 to -26.46
Treatment	Difference	t	P value	Summary
Day 1	-0.5	0.6247	P > 0.05	ns
Day 9	-1.333	1.666	P > 0.05	ns
Day 18	-13.33	16.66	P<0.001	***
Day 27	-29.33	36.65	P<0.001	***
OUA vs OUA + SNL80
Treatment	OUA	OUA + SNL80	Difference	95% CI of diff.
Day 1	47.33	47	-0.3333	-3.203 to 2.536
Day 9	76.67	75.83	-0.8333	-3.703 to 2.036
Day 18	85.67	70.67	-15	-17.87 to -12.13
Day 27	97.83	63.5	-34.33	-37.20 to -31.46
Treatment	Difference	t	P value	Summary
Day 1	-0.3333	0.4165	P > 0.05	ns
Day 9	-0.8333	1.041	P > 0.05	ns
Day 18	-15	18.74	P<0.001	***
Day 27	-34.33	42.9	P<0.001	***
OUA vs OUA + Li60
Treatment	OUA	OUA + Li60	Difference	95% CI of diff.
Day 1	47.33	46.33	-1	-3.870 to 1.870
Day 9	76.67	75.17	-1.5	-4.370 to 1.370
Day 18	85.67	66.17	-19.5	-22.37 to -16.63
Day 27	97.83	57.17	-40.67	-43.54 to -37.80
Treatment	Difference	t	P value	Summary
Day 1	-1	1.249	P > 0.05	ns
Day 9	-1.5	1.874	P > 0.05	ns
Day 18	-19.5	24.36	P<0.001	***
Day 27	-40.67	50.81	P<0.001	***
OUA vs OUA + SNL80 + Li60
Treatment	OUA	OUA + SNL80 + Li60	Difference	95% CI of diff.
Day 1	47.33	46.83	-0.5	-3.370 to 2.370
Day 9	76.67	75.5	-1.167	-4.036 to 1.703
Day 18	85.67	64.17	-21.5	-24.37 to -18.63
Day 27	97.83	54.17	-43.67	-46.54 to -40.80
Treatment	Difference	t	P value	Summary
Day 1	-0.5	0.6247	P > 0.05	ns
Day 9	-1.167	1.458	P > 0.05	ns
Day 18	-21.5	26.86	P<0.001	***
Day 27	-43.67	54.56	P<0.001	***
OUA + SNL40 vs OUA + SNL80
Treatment	OUA + SNL40	OUA + SNL80	Difference	95% CI of diff.
Day 1	46.83	47	0.1667	-2.703 to 3.036
Day 9	75.33	75.83	0.5	-2.370 to 3.370
Day 18	72.33	70.67	-1.667	-4.536 to 1.203
Day 27	68.5	63.5	-5	-7.870 to -2.130
Treatment	Difference	t	P value	Summary
Day 1	0.1667	0.2082	P > 0.05	ns
Day 9	0.5	0.6247	P > 0.05	ns
Day 18	-1.667	2.082	P > 0.05	ns
Day 27	-5	6.247	P<0.001	***
OUA + SNL40 vs OUA + Li60
Treatment	OUA + SNL40	OUA + Li60	Difference	95% CI of diff.
Day 1	46.83	46.33	-0.5	-3.370 to 2.370
Day 9	75.33	75.17	-0.1667	-3.036 to 2.703
Day 18	72.33	66.17	-6.167	-9.036 to -3.297
Day 27	68.5	57.17	-11.33	-14.20 to -8.464
Treatment	Difference	t	P value	Summary
Day 1	-0.5	0.6247	P > 0.05	ns
Day 9	-0.1667	0.2082	P > 0.05	ns
Day 18	-6.167	7.705	P<0.001	***
Day 27	-11.33	14.16	P<0.001	***
OUA + SNL40 vs OUA + SNL80 + Li60
Treatment	OUA + SNL40	OUA + SNL80 + Li60	Difference	95% CI of diff.
Day 1	46.83	46.83	0	-2.870 to 2.870
Day 9	75.33	75.5	0.1667	-2.703 to 3.036
Day 18	72.33	64.17	-8.167	-11.04 to -5.297
Day 27	68.5	54.17	-14.33	-17.20 to -11.46
Treatment	Difference	t	P value	Summary
Day 1	0	0	P > 0.05	ns
Day 9	0.1667	0.2082	P > 0.05	ns
Day 18	-8.167	10.2	P<0.001	***
Day 27	-14.33	17.91	P<0.001	***
OUA + SNL80 vs OUA + Li60
Treatment	OUA + SNL80	OUA + Li60	Difference	95% CI of diff.
Day 1	47	46.33	-0.6667	-3.536 to 2.203
Day 9	75.83	75.17	-0.6667	-3.536 to 2.203
Day 18	70.67	66.17	-4.5	-7.370 to -1.630
Day 27	63.5	57.17	-6.333	-9.203 to -3.464
Treatment	Difference	t	P value	Summary
Day 1	-0.6667	0.8329	P > 0.05	ns
Day 9	-0.6667	0.8329	P > 0.05	ns
Day 18	-4.5	5.622	P<0.001	***
Day 27	-6.333	7.913	P<0.001	***
OUA + SNL80 vs OUA + SNL80 + Li60
Treatment	OUA + SNL80	OUA + SNL80 + Li60	Difference	95% CI of diff.
Day 1	47	46.83	-0.1667	-3.036 to 2.703
Day 9	75.83	75.5	-0.3333	-3.203 to 2.536
Day 18	70.67	64.17	-6.5	-9.370 to -3.630
Day 27	63.5	54.17	-9.333	-12.20 to -6.464
Treatment	Difference	t	P value	Summary
Day 1	-0.1667	0.2082	P > 0.05	ns
Day 9	-0.3333	0.4165	P > 0.05	ns
Day 18	-6.5	8.121	P<0.001	***
Day 27	-9.333	11.66	P<0.001	***
OUA + Li60 vs OUA + SNL80 + Li60
Treatment	OUA + Li60	OUA + SNL80 + Li60	Difference	95% CI of diff.
Day 1	46.33	46.83	0.5	-2.370 to 3.370
Day 9	75.17	75.5	0.3333	-2.536 to 3.203
Day 18	66.17	64.17	-2	-4.870 to 0.8698
Day 27	57.17	54.17	-3	-5.870 to -0.1302
Treatment	Difference	t	P value	Summary
Day 1	0.5	0.6247	P > 0.05	ns
Day 9	0.3333	0.4165	P > 0.05	ns
Day 18	-2	2.499	P > 0.05	ns
Day 27	-3	3.748	P<0.001	***
Source of Variation	DF	Sum of Squares	Mean Square
Interaction	21	10400	495.3
Time	3	9312	3104
Treatment	7	20040	2862
Subjects (matching)	40	64.04	1.601
Residual (Error)	120	243.5	2.029
Total	191	40060
Does Time have the same effect at all values of Treatment?
Interaction accounts for 25.97% of the total variance.
F = 244.12. DFn=21 DFd=120
The P value is <0.0001
If there is no interaction overall, there is a less than 0.01% chance of randomly observing so much
interaction in an experiment of this size. The interaction is considered extremely significant.
Since the interaction is statistically significant, the P values that
follow for the row and column effects are difficult to interpret.
Does Treatment affect the result? (Are the curves different?)
Treatment accounts for 50.02% of the total variance (after adjusting for matching).
F = 1787.76. DFn=7 DFd=120
The P value is <0.0001
If Treatment has no effect overall, there is a less than 0.01chance of randomly observing an
effect this big (or bigger) in an experiment of this size. The effect is considered extremely significant.
Does Time affect the result? (Are the curves horizontal?)
Time accounts for 23.25% of the total variance (after adjusting for matching).
F = 1530.02. DFn=3 DFd=120
The P value is <0.0001
If Time has no effect overall, there is a less than 0.01chance of randomly observing an
effect this big (or bigger) in an experiment of this size. The effect is considered extremely significant.
Was the matching effective?
F = 0.79. DFn=40 DFd=120
The P value = 0.8030
If matching were not effective overall, there is a 80% chance of randomly observing an
effect this big (or bigger) in an experiment of this size. The effect is considered not significant.

## Sheet: OFT rearing
	Vehicle control						Sham control						SNL80 perse						OUA						OUA + SNL40						OUA + SNL80						OUA + Li60						OUA + SNL80 + Li60
Day 1	17	22	18	21	19	20	20	22	18	19	21	17	20	20	17	19	22	18	19	17	22	18	19	21	17	21	19	22	20	18	19	22	20	21	17	18	18	20	22	19	17	21	20	22	20	17	19	18
Day 7	18	20	22	17	20	21	19	20	20	22	21	18	17	19	20	22	21	18	31	30	32	31	31	30	32	29	32	29	30	30	29	32	30	31	31	29	30	32	31	29	31	29	30	32	31	30	29	30
Day 14	20	22	21	18	19	17	18	17	19	20	19	21	22	18	19	20	21	17	36	37	35	36	36	35	35	35	33	34	35	34	34	34	34	32	35	34	29	29	29	29	29	30	28	30	28	29	29	29
Day 21	19	17	18	17	20	22	21	17	19	18	20	22	19	18	17	20	22	21	40	37	39	38	37	40	34	33	34	34	34	34	31	30	30	30	30	30	27	27	27	29	27	27	25	24	25	26	24	24
Day 28	22	21	19	18	20	17	19	20	22	17	18	20	21	20	17	19	22	18	41	39	41	42	40	39	30	30	31	31	30	31	28	28	27	28	27	28	24	25	25	26	24	24	22	22	22	21	22	22
	Vehicle control	Sham control	SNL80 perse	OUA	OUA + SNL40	OUA + SNL80	OUA + Li60	OUA + SNL80 + Li60
Number of values	5	5	5	5	5	5	5	5
Minimum	18.83	19	19.33	19.33	19.5	19.5	19.5	19.33
25% Percentile	19.17	19.17	19.42	25.08	24.92	23.58	22.08	20.58
Median	19.5	19.5	19.5	35.83	30.5	30.17	27.33	24.67
75% Percentile	19.58	19.75	19.5	39.42	34.08	32.08	29.75	29.58
Maximum	19.67	20	19.5	40.33	34.33	33.83	30.33	30.33
Mean	19.4	19.47	19.47	32.97	29.7	28.3	26.2	25
Std. Deviation	0.3249	0.3613	0.07454	8.419	5.992	5.387	4.313	4.62
Std. Error	0.1453	0.1616	0.03333	3.765	2.68	2.409	1.929	2.066
Lower 95% CI of mean	19	19.02	19.37	22.51	22.26	21.61	20.84	19.26
Upper 95% CI of mean	19.8	19.92	19.56	43.42	37.14	34.99	31.56	30.74
KS normality test
KS distance	0.4209	0.2633	0.4726	0.2333	0.3421	0.2532	0.2036	0.1966
P value	0.0041	> 0.10	0.0005	> 0.10	0.0563	> 0.10	> 0.10	> 0.10
Passed normality test (alpha=0.05)?	No	Yes	No	Yes	Yes	Yes	Yes	Yes
P value summary	**	ns	***	ns	ns	ns	ns	ns
Sum	97	97.33	97.33	164.8	148.5	141.5	131	125
Parameter
Table Analyzed	Data 1
Two-way RM ANOVA	Matching by cols
Source of Variation	% of total variation	P value
Interaction	21.47	< 0.0001
Time	19.36	< 0.0001
Treatment	55.22	< 0.0001
Subjects (matching)	0.8438	0.3497
Source of Variation	P value summary	Significant?
Interaction	***	Yes
Time	***	Yes
Treatment	***	Yes
Subjects (matching)	ns	No
Source of Variation	Df	Sum-of-squares	Mean square	F
Interaction	28	2221	79.32	39.51
Time	4	2003	500.8	249.4
Treatment	7	5714	816.2	374
Subjects (matching)	40	87.3	2.183	1.087
Residual	160	321.2	2.008
Number of missing values	0
Bonferroni posttests
Vehicle control vs Sham control
Treatment	Vehicle control	Sham control	Difference	95% CI of diff.
Day 1	19.5	19.5	0	-2.997 to 2.997
Day 7	19.67	20	0.3333	-2.664 to 3.330
Day 14	19.5	19	-0.5	-3.497 to 2.497
Day 21	18.83	19.5	0.6667	-2.330 to 3.664
Day 28	19.5	19.33	-0.1667	-3.164 to 2.830
Treatment	Difference	t	P value	Summary
Day 1	0	0	P > 0.05	ns
Day 7	0.3333	0.404	P > 0.05	ns
Day 14	-0.5	0.606	P > 0.05	ns
Day 21	0.6667	0.808	P > 0.05	ns
Day 28	-0.1667	0.202	P > 0.05	ns
Vehicle control vs SNL80 perse
Treatment	Vehicle control	SNL80 perse	Difference	95% CI of diff.
Day 1	19.5	19.33	-0.1667	-3.164 to 2.830
Day 7	19.67	19.5	-0.1667	-3.164 to 2.830
Day 14	19.5	19.5	0	-2.997 to 2.997
Day 21	18.83	19.5	0.6667	-2.330 to 3.664
Day 28	19.5	19.5	0	-2.997 to 2.997
Treatment	Difference	t	P value	Summary
Day 1	-0.1667	0.202	P > 0.05	ns
Day 7	-0.1667	0.202	P > 0.05	ns
Day 14	0	0	P > 0.05	ns
Day 21	0.6667	0.808	P > 0.05	ns
Day 28	0	0	P > 0.05	ns
Vehicle control vs OUA
Treatment	Vehicle control	OUA	Difference	95% CI of diff.
Day 1	19.5	19.33	-0.1667	-3.164 to 2.830
Day 7	19.67	30.83	11.17	8.170 to 14.16
Day 14	19.5	35.83	16.33	13.34 to 19.33
Day 21	18.83	38.5	19.67	16.67 to 22.66
Day 28	19.5	40.33	20.83	17.84 to 23.83
Treatment	Difference	t	P value	Summary
Day 1	-0.1667	0.202	P > 0.05	ns
Day 7	11.17	13.53	P<0.001	***
Day 14	16.33	19.79	P<0.001	***
Day 21	19.67	23.83	P<0.001	***
Day 28	20.83	25.25	P<0.001	***
Vehicle control vs OUA + SNL40
Treatment	Vehicle control	OUA + SNL40	Difference	95% CI of diff.
Day 1	19.5	19.5	0	-2.997 to 2.997
Day 7	19.67	30.33	10.67	7.670 to 13.66
Day 14	19.5	34.33	14.83	11.84 to 17.83
Day 21	18.83	33.83	15	12.00 to 18.00
Day 28	19.5	30.5	11	8.003 to 14.00
Treatment	Difference	t	P value	Summary
Day 1	0	0	P > 0.05	ns
Day 7	10.67	12.93	P<0.001	***
Day 14	14.83	17.98	P<0.001	***
Day 21	15	18.18	P<0.001	***
Day 28	11	13.33	P<0.001	***
Vehicle control vs OUA + SNL80
Treatment	Vehicle control	OUA + SNL80	Difference	95% CI of diff.
Day 1	19.5	19.5	0	-2.997 to 2.997
Day 7	19.67	30.33	10.67	7.670 to 13.66
Day 14	19.5	33.83	14.33	11.34 to 17.33
Day 21	18.83	30.17	11.33	8.336 to 14.33
Day 28	19.5	27.67	8.167	5.170 to 11.16
Treatment	Difference	t	P value	Summary
Day 1	0	0	P > 0.05	ns
Day 7	10.67	12.93	P<0.001	***
Day 14	14.33	17.37	P<0.001	***
Day 21	11.33	13.74	P<0.001	***
Day 28	8.167	9.897	P<0.001	***
Vehicle control vs OUA + Li60
Treatment	Vehicle control	OUA + Li60	Difference	95% CI of diff.
Day 1	19.5	19.5	0	-2.997 to 2.997
Day 7	19.67	30.33	10.67	7.670 to 13.66
Day 14	19.5	29.17	9.667	6.670 to 12.66
Day 21	18.83	27.33	8.5	5.503 to 11.50
Day 28	19.5	24.67	5.167	2.170 to 8.164
Treatment	Difference	t	P value	Summary
Day 1	0	0	P > 0.05	ns
Day 7	10.67	12.93	P<0.001	***
Day 14	9.667	11.72	P<0.001	***
Day 21	8.5	10.3	P<0.001	***
Day 28	5.167	6.262	P<0.001	***
Vehicle control vs OUA + SNL80 + Li60
Treatment	Vehicle control	OUA + SNL80 + Li60	Difference	95% CI of diff.
Day 1	19.5	19.33	-0.1667	-3.164 to 2.830
Day 7	19.67	30.33	10.67	7.670 to 13.66
Day 14	19.5	28.83	9.333	6.336 to 12.33
Day 21	18.83	24.67	5.833	2.836 to 8.830
Day 28	19.5	21.83	2.333	-0.6637 to 5.330
Treatment	Difference	t	P value	Summary
Day 1	-0.1667	0.202	P > 0.05	ns
Day 7	10.67	12.93	P<0.001	***
Day 14	9.333	11.31	P<0.001	***
Day 21	5.833	7.07	P<0.001	***
Day 28	2.333	2.828	P < 0.05	*
Sham control vs SNL80 perse
Treatment	Sham control	SNL80 perse	Difference	95% CI of diff.
Day 1	19.5	19.33	-0.1667	-3.164 to 2.830
Day 7	20	19.5	-0.5	-3.497 to 2.497
Day 14	19	19.5	0.5	-2.497 to 3.497
Day 21	19.5	19.5	0	-2.997 to 2.997
Day 28	19.33	19.5	0.1667	-2.830 to 3.164
Treatment	Difference	t	P value	Summary
Day 1	-0.1667	0.202	P > 0.05	ns
Day 7	-0.5	0.606	P > 0.05	ns
Day 14	0.5	0.606	P > 0.05	ns
Day 21	0	0	P > 0.05	ns
Day 28	0.1667	0.202	P > 0.05	ns
Sham control vs OUA
Treatment	Sham control	OUA	Difference	95% CI of diff.
Day 1	19.5	19.33	-0.1667	-3.164 to 2.830
Day 7	20	30.83	10.83	7.836 to 13.83
Day 14	19	35.83	16.83	13.84 to 19.83
Day 21	19.5	38.5	19	16.00 to 22.00
Day 28	19.33	40.33	21	18.00 to 24.00
Treatment	Difference	t	P value	Summary
Day 1	-0.1667	0.202	P > 0.05	ns
Day 7	10.83	13.13	P<0.001	***
Day 14	16.83	20.4	P<0.001	***
Day 21	19	23.03	P<0.001	***
Day 28	21	25.45	P<0.001	***
Sham control vs OUA + SNL40
Treatment	Sham control	OUA + SNL40	Difference	95% CI of diff.
Day 1	19.5	19.5	0	-2.997 to 2.997
Day 7	20	30.33	10.33	7.336 to 13.33
Day 14	19	34.33	15.33	12.34 to 18.33
Day 21	19.5	33.83	14.33	11.34 to 17.33
Day 28	19.33	30.5	11.17	8.170 to 14.16
Treatment	Difference	t	P value	Summary
Day 1	0	0	P > 0.05	ns
Day 7	10.33	12.52	P<0.001	***
Day 14	15.33	18.58	P<0.001	***
Day 21	14.33	17.37	P<0.001	***
Day 28	11.17	13.53	P<0.001	***
Sham control vs OUA + SNL80
Treatment	Sham control	OUA + SNL80	Difference	95% CI of diff.
Day 1	19.5	19.5	0	-2.997 to 2.997
Day 7	20	30.33	10.33	7.336 to 13.33
Day 14	19	33.83	14.83	11.84 to 17.83
Day 21	19.5	30.17	10.67	7.670 to 13.66
Day 28	19.33	27.67	8.333	5.336 to 11.33
Treatment	Difference	t	P value	Summary
Day 1	0	0	P > 0.05	ns
Day 7	10.33	12.52	P<0.001	***
Day 14	14.83	17.98	P<0.001	***
Day 21	10.67	12.93	P<0.001	***
Day 28	8.333	10.1	P<0.001	***
Sham control vs OUA + Li60
Treatment	Sham control	OUA + Li60	Difference	95% CI of diff.
Day 1	19.5	19.5	0	-2.997 to 2.997
Day 7	20	30.33	10.33	7.336 to 13.33
Day 14	19	29.17	10.17	7.170 to 13.16
Day 21	19.5	27.33	7.833	4.836 to 10.83
Day 28	19.33	24.67	5.333	2.336 to 8.330
Treatment	Difference	t	P value	Summary
Day 1	0	0	P > 0.05	ns
Day 7	10.33	12.52	P<0.001	***
Day 14	10.17	12.32	P<0.001	***
Day 21	7.833	9.493	P<0.001	***
Day 28	5.333	6.464	P<0.001	***
Sham control vs OUA + SNL80 + Li60
Treatment	Sham control	OUA + SNL80 + Li60	Difference	95% CI of diff.
Day 1	19.5	19.33	-0.1667	-3.164 to 2.830
Day 7	20	30.33	10.33	7.336 to 13.33
Day 14	19	28.83	9.833	6.836 to 12.83
Day 21	19.5	24.67	5.167	2.170 to 8.164
Day 28	19.33	21.83	2.5	-0.4970 to 5.497
Treatment	Difference	t	P value	Summary
Day 1	-0.1667	0.202	P > 0.05	ns
Day 7	10.33	12.52	P<0.001	***
Day 14	9.833	11.92	P<0.001	***
Day 21	5.167	6.262	P<0.001	***
Day 28	2.5	3.03	P < 0.05	*
SNL80 perse vs OUA
Treatment	SNL80 perse	OUA	Difference	95% CI of diff.
Day 1	19.33	19.33	0	-2.997 to 2.997
Day 7	19.5	30.83	11.33	8.336 to 14.33
Day 14	19.5	35.83	16.33	13.34 to 19.33
Day 21	19.5	38.5	19	16.00 to 22.00
Day 28	19.5	40.33	20.83	17.84 to 23.83
Treatment	Difference	t	P value	Summary
Day 1	0	0	P > 0.05	ns
Day 7	11.33	13.74	P<0.001	***
Day 14	16.33	19.79	P<0.001	***
Day 21	19	23.03	P<0.001	***
Day 28	20.83	25.25	P<0.001	***
SNL80 perse vs OUA + SNL40
Treatment	SNL80 perse	OUA + SNL40	Difference	95% CI of diff.
Day 1	19.33	19.5	0.1667	-2.830 to 3.164
Day 7	19.5	30.33	10.83	7.836 to 13.83
Day 14	19.5	34.33	14.83	11.84 to 17.83
Day 21	19.5	33.83	14.33	11.34 to 17.33
Day 28	19.5	30.5	11	8.003 to 14.00
Treatment	Difference	t	P value	Summary
Day 1	0.1667	0.202	P > 0.05	ns
Day 7	10.83	13.13	P<0.001	***
Day 14	14.83	17.98	P<0.001	***
Day 21	14.33	17.37	P<0.001	***
Day 28	11	13.33	P<0.001	***
SNL80 perse vs OUA + SNL80
Treatment	SNL80 perse	OUA + SNL80	Difference	95% CI of diff.
Day 1	19.33	19.5	0.1667	-2.830 to 3.164
Day 7	19.5	30.33	10.83	7.836 to 13.83
Day 14	19.5	33.83	14.33	11.34 to 17.33
Day 21	19.5	30.17	10.67	7.670 to 13.66
Day 28	19.5	27.67	8.167	5.170 to 11.16
Treatment	Difference	t	P value	Summary
Day 1	0.1667	0.202	P > 0.05	ns
Day 7	10.83	13.13	P<0.001	***
Day 14	14.33	17.37	P<0.001	***
Day 21	10.67	12.93	P<0.001	***
Day 28	8.167	9.897	P<0.001	***
SNL80 perse vs OUA + Li60
Treatment	SNL80 perse	OUA + Li60	Difference	95% CI of diff.
Day 1	19.33	19.5	0.1667	-2.830 to 3.164
Day 7	19.5	30.33	10.83	7.836 to 13.83
Day 14	19.5	29.17	9.667	6.670 to 12.66
Day 21	19.5	27.33	7.833	4.836 to 10.83
Day 28	19.5	24.67	5.167	2.170 to 8.164
Treatment	Difference	t	P value	Summary
Day 1	0.1667	0.202	P > 0.05	ns
Day 7	10.83	13.13	P<0.001	***
Day 14	9.667	11.72	P<0.001	***
Day 21	7.833	9.493	P<0.001	***
Day 28	5.167	6.262	P<0.001	***
SNL80 perse vs OUA + SNL80 + Li60
Treatment	SNL80 perse	OUA + SNL80 + Li60	Difference	95% CI of diff.
Day 1	19.33	19.33	0	-2.997 to 2.997
Day 7	19.5	30.33	10.83	7.836 to 13.83
Day 14	19.5	28.83	9.333	6.336 to 12.33
Day 21	19.5	24.67	5.167	2.170 to 8.164
Day 28	19.5	21.83	2.333	-0.6637 to 5.330
Treatment	Difference	t	P value	Summary
Day 1	0	0	P > 0.05	ns
Day 7	10.83	13.13	P<0.001	***
Day 14	9.333	11.31	P<0.001	***
Day 21	5.167	6.262	P<0.001	***
Day 28	2.333	2.828	P < 0.05	*
OUA vs OUA + SNL40
Treatment	OUA	OUA + SNL40	Difference	95% CI of diff.
Day 1	19.33	19.5	0.1667	-2.830 to 3.164
Day 7	30.83	30.33	-0.5	-3.497 to 2.497
Day 14	35.83	34.33	-1.5	-4.497 to 1.497
Day 21	38.5	33.83	-4.667	-7.664 to -1.670
Day 28	40.33	30.5	-9.833	-12.83 to -6.836
Treatment	Difference	t	P value	Summary
Day 1	0.1667	0.202	P > 0.05	ns
Day 7	-0.5	0.606	P > 0.05	ns
Day 14	-1.5	1.818	P > 0.05	ns
Day 21	-4.667	5.656	P<0.001	***
Day 28	-9.833	11.92	P<0.001	***
OUA vs OUA + SNL80
Treatment	OUA	OUA + SNL80	Difference	95% CI of diff.
Day 1	19.33	19.5	0.1667	-2.830 to 3.164
Day 7	30.83	30.33	-0.5	-3.497 to 2.497
Day 14	35.83	33.83	-2	-4.997 to 0.9970
Day 21	38.5	30.17	-8.333	-11.33 to -5.336
Day 28	40.33	27.67	-12.67	-15.66 to -9.670
Treatment	Difference	t	P value	Summary
Day 1	0.1667	0.202	P > 0.05	ns
Day 7	-0.5	0.606	P > 0.05	ns
Day 14	-2	2.424	P > 0.05	ns
Day 21	-8.333	10.1	P<0.001	***
Day 28	-12.67	15.35	P<0.001	***
OUA vs OUA + Li60
Treatment	OUA	OUA + Li60	Difference	95% CI of diff.
Day 1	19.33	19.5	0.1667	-2.830 to 3.164
Day 7	30.83	30.33	-0.5	-3.497 to 2.497
Day 14	35.83	29.17	-6.667	-9.664 to -3.670
Day 21	38.5	27.33	-11.17	-14.16 to -8.170
Day 28	40.33	24.67	-15.67	-18.66 to -12.67
Treatment	Difference	t	P value	Summary
Day 1	0.1667	0.202	P > 0.05	ns
Day 7	-0.5	0.606	P > 0.05	ns
Day 14	-6.667	8.08	P<0.001	***
Day 21	-11.17	13.53	P<0.001	***
Day 28	-15.67	18.99	P<0.001	***
OUA vs OUA + SNL80 + Li60
Treatment	OUA	OUA + SNL80 + Li60	Difference	95% CI of diff.
Day 1	19.33	19.33	0	-2.997 to 2.997
Day 7	30.83	30.33	-0.5	-3.497 to 2.497
Day 14	35.83	28.83	-7	-9.997 to -4.003
Day 21	38.5	24.67	-13.83	-16.83 to -10.84
Day 28	40.33	21.83	-18.5	-21.50 to -15.50
Treatment	Difference	t	P value	Summary
Day 1	0	0	P > 0.05	ns
Day 7	-0.5	0.606	P > 0.05	ns
Day 14	-7	8.484	P<0.001	***
Day 21	-13.83	16.77	P<0.001	***
Day 28	-18.5	22.42	P<0.001	***
OUA + SNL40 vs OUA + SNL80
Treatment	OUA + SNL40	OUA + SNL80	Difference	95% CI of diff.
Day 1	19.5	19.5	0	-2.997 to 2.997
Day 7	30.33	30.33	0	-2.997 to 2.997
Day 14	34.33	33.83	-0.5	-3.497 to 2.497
Day 21	33.83	30.17	-3.667	-6.664 to -0.6697
Day 28	30.5	27.67	-2.833	-5.830 to 0.1637
Treatment	Difference	t	P value	Summary
Day 1	0	0	P > 0.05	ns
Day 7	0	0	P > 0.05	ns
Day 14	-0.5	0.606	P > 0.05	ns
Day 21	-3.667	4.444	P<0.001	***
Day 28	-2.833	3.434	P<0.01	**
OUA + SNL40 vs OUA + Li60
Treatment	OUA + SNL40	OUA + Li60	Difference	95% CI of diff.
Day 1	19.5	19.5	0	-2.997 to 2.997
Day 7	30.33	30.33	0	-2.997 to 2.997
Day 14	34.33	29.17	-5.167	-8.164 to -2.170
Day 21	33.83	27.33	-6.5	-9.497 to -3.503
Day 28	30.5	24.67	-5.833	-8.830 to -2.836
Treatment	Difference	t	P value	Summary
Day 1	0	0	P > 0.05	ns
Day 7	0	0	P > 0.05	ns
Day 14	-5.167	6.262	P<0.001	***
Day 21	-6.5	7.878	P<0.001	***
Day 28	-5.833	7.07	P<0.001	***
OUA + SNL40 vs OUA + SNL80 + Li60
Treatment	OUA + SNL40	OUA + SNL80 + Li60	Difference	95% CI of diff.
Day 1	19.5	19.33	-0.1667	-3.164 to 2.830
Day 7	30.33	30.33	0	-2.997 to 2.997
Day 14	34.33	28.83	-5.5	-8.497 to -2.503
Day 21	33.83	24.67	-9.167	-12.16 to -6.170
Day 28	30.5	21.83	-8.667	-11.66 to -5.670
Treatment	Difference	t	P value	Summary
Day 1	-0.1667	0.202	P > 0.05	ns
Day 7	0	0	P > 0.05	ns
Day 14	-5.5	6.666	P<0.001	***
Day 21	-9.167	11.11	P<0.001	***
Day 28	-8.667	10.5	P<0.001	***
OUA + SNL80 vs OUA + Li60
Treatment	OUA + SNL80	OUA + Li60	Difference	95% CI of diff.
Day 1	19.5	19.5	0	-2.997 to 2.997
Day 7	30.33	30.33	0	-2.997 to 2.997
Day 14	33.83	29.17	-4.667	-7.664 to -1.670
Day 21	30.17	27.33	-2.833	-5.830 to 0.1637
Day 28	27.67	24.67	-3	-5.997 to -0.003000
Treatment	Difference	t	P value	Summary
Day 1	0	0	P > 0.05	ns
Day 7	0	0	P > 0.05	ns
Day 14	-4.667	5.656	P<0.001	***
Day 21	-2.833	3.434	P<0.01	**
Day 28	-3	3.636	P<0.01	**
OUA + SNL80 vs OUA + SNL80 + Li60
Treatment	OUA + SNL80	OUA + SNL80 + Li60	Difference	95% CI of diff.
Day 1	19.5	19.33	-0.1667	-3.164 to 2.830
Day 7	30.33	30.33	0	-2.997 to 2.997
Day 14	33.83	28.83	-5	-7.997 to -2.003
Day 21	30.17	24.67	-5.5	-8.497 to -2.503
Day 28	27.67	21.83	-5.833	-8.830 to -2.836
Treatment	Difference	t	P value	Summary
Day 1	-0.1667	0.202	P > 0.05	ns
Day 7	0	0	P > 0.05	ns
Day 14	-5	6.06	P<0.001	***
Day 21	-5.5	6.666	P<0.001	***
Day 28	-5.833	7.07	P<0.001	***
OUA + Li60 vs OUA + SNL80 + Li60
Treatment	OUA + Li60	OUA + SNL80 + Li60	Difference	95% CI of diff.
Day 1	19.5	19.33	-0.1667	-3.164 to 2.830
Day 7	30.33	30.33	0	-2.997 to 2.997
Day 14	29.17	28.83	-0.3333	-3.330 to 2.664
Day 21	27.33	24.67	-2.667	-5.664 to 0.3303
Day 28	24.67	21.83	-2.833	-5.830 to 0.1637
Treatment	Difference	t	P value	Summary
Day 1	-0.1667	0.202	P > 0.05	ns
Day 7	0	0	P > 0.05	ns
Day 14	-0.3333	0.404	P > 0.05	ns
Day 21	-2.667	3.232	P<0.01	**
Day 28	-2.833	3.434	P<0.01	**
Source of Variation	DF	Sum of Squares	Mean Square
Interaction	28	2221	79.32
Time	4	2003	500.8
Treatment	7	5714	816.2
Subjects (matching)	40	87.3	2.183
Residual (Error)	160	321.2	2.008
Total	239	10350
Does Time have the same effect at all values of Treatment?
Interaction accounts for 21.47% of the total variance.
F = 39.51. DFn=28 DFd=160
The P value is <0.0001
If there is no interaction overall, there is a less than 0.01% chance of randomly observing so much
interaction in an experiment of this size. The interaction is considered extremely significant.
Since the interaction is statistically significant, the P values that
follow for the row and column effects are difficult to interpret.
Does Treatment affect the result? (Are the curves different?)
Treatment accounts for 55.22% of the total variance (after adjusting for matching).
F = 373.99. DFn=7 DFd=160
The P value is <0.0001
If Treatment has no effect overall, there is a less than 0.01chance of randomly observing an
effect this big (or bigger) in an experiment of this size. The effect is considered extremely significant.
Does Time affect the result? (Are the curves horizontal?)
Time accounts for 19.36% of the total variance (after adjusting for matching).
F = 249.44. DFn=4 DFd=160
The P value is <0.0001
If Time has no effect overall, there is a less than 0.01chance of randomly observing an
effect this big (or bigger) in an experiment of this size. The effect is considered extremely significant.
Was the matching effective?
F = 1.09. DFn=40 DFd=160
The P value = 0.3497
If matching were not effective overall, there is a 35% chance of randomly observing an
effect this big (or bigger) in an experiment of this size. The effect is considered not significant.

## Sheet: OFT crossing
	Vehicle control						Sham control						SNL80 perse						OUA						OUA + SNL40						OUA + SNL80						OUA + Li60						OUA + SNL80 + Li60
Day 1	43	42	46	45	44	42	43	45	44	43	46	42	45	45	42	44	43	46	44	42	46	45	43	45	44	42	43	43	46	45	46	42	45	43	44	45	45	42	46	43	45	44	45	42	46	43	45	44
Day 7	45	42	44	43	46	46	42	46	43	45	44	42	46	42	45	43	44	42	65	64	65	65	65	63	62	61	62	62	59	61	60	62	59	63	64	62	62	62	61	62	63	62	63	62	62	62	62	62
Day 14	42	46	45	44	43	44	45	46	44	42	43	46	42	42	42	46	43	44	75	79	76	78	77	77	71	74	72	73	70	72	70	72	69	71	72	69	67	68	66	66	66	67	66	65	64	65	65	66
Day 21	44	46	43	45	44	42	42	43	46	44	45	45	44	43	45	46	42	43	85	88	85	90	89	87	70	67	69	68	68	69	61	65	63	65	65	62	59	60	59	59	62	60	58	55	55	56	55	56
Day 28	46	42	45	43	43	44	42	43	45	44	46	42	44	43	45	43	42	46	100	97	95	98	96	99	64	60	61	63	62	64	58	55	59	57	56	58	50	54	49	52	53	51	50	45	49	47	46	48
	Vehicle control	Sham control	SNL80 perse	OUA	OUA + SNL40	OUA + SNL80	OUA + Li60	OUA + SNL80 + Li60
Number of values	5	5	5	5	5	5	5	5
Minimum	43.67	43.67	43.17	44.17	43.83	44.17	44.17	44.17
25% Percentile	43.75	43.67	43.42	54.33	52.5	50.67	47.83	45.83
Median	44	43.83	43.83	77	62.33	61.67	59.83	55.83
75% Percentile	44.17	44.25	44	92.42	70.25	67	64.33	63.67
Maximum	44.33	44.33	44.17	97.5	72	70.5	66.67	65.17
Mean	43.97	43.93	43.73	74.1	61.57	59.4	56.83	54.97
Std. Deviation	0.2472	0.3028	0.3651	20.73	10.86	9.775	8.962	9.069
Std. Error	0.1106	0.1354	0.1633	9.272	4.859	4.371	4.008	4.056
Lower 95% CI of mean	43.66	43.56	43.28	48.36	48.08	47.26	45.71	43.71
Upper 95% CI of mean	44.27	44.31	44.19	99.84	75.06	71.54	67.96	66.23
KS normality test
KS distance	0.2464	0.2294	0.2276	0.1556	0.2853	0.2096	0.2311	0.1948
P value	> 0.10	> 0.10	> 0.10	> 0.10	> 0.10	> 0.10	> 0.10	> 0.10
Passed normality test (alpha=0.05)?	Yes	Yes	Yes	Yes	Yes	Yes	Yes	Yes
P value summary	ns	ns	ns	ns	ns	ns	ns	ns
Sum	219.8	219.7	218.7	370.5	307.8	297	284.2	274.8
Parameter
Table Analyzed	Data 1
Two-way RM ANOVA	Matching by cols
Source of Variation	% of total variation	P value
Interaction	26.47	< 0.0001
Time	17.68	< 0.0001
Treatment	54.87	< 0.0001
Subjects (matching)	0.1869	0.5792
Source of Variation	P value summary	Significant?
Interaction	***	Yes
Time	***	Yes
Treatment	***	Yes
Subjects (matching)	ns	No
Source of Variation	Df	Sum-of-squares	Mean square	F
Interaction	28	11600	414.4	190
Time	4	7748	1937	888.2
Treatment	7	24050	3435	1678
Subjects (matching)	40	81.9	2.048	0.9389
Residual	160	348.9	2.181
Number of missing values	0
Bonferroni posttests
Vehicle control vs Sham control
Treatment	Vehicle control	Sham control	Difference	95% CI of diff.
Day 1	43.67	43.83	0.1667	-2.911 to 3.244
Day 7	44.33	43.67	-0.6667	-3.744 to 2.411
Day 14	44	44.33	0.3333	-2.745 to 3.411
Day 21	44	44.17	0.1667	-2.911 to 3.245
Day 28	43.83	43.67	-0.1667	-3.244 to 2.911
Treatment	Difference	t	P value	Summary
Day 1	0.1667	0.1967	P > 0.05	ns
Day 7	-0.6667	0.7867	P > 0.05	ns
Day 14	0.3333	0.3934	P > 0.05	ns
Day 21	0.1667	0.1967	P > 0.05	ns
Day 28	-0.1667	0.1967	P > 0.05	ns
Vehicle control vs SNL80 perse
Treatment	Vehicle control	SNL80 perse	Difference	95% CI of diff.
Day 1	43.67	44.17	0.5	-2.578 to 3.578
Day 7	44.33	43.67	-0.6667	-3.744 to 2.411
Day 14	44	43.17	-0.8333	-3.911 to 2.245
Day 21	44	43.83	-0.1667	-3.245 to 2.911
Day 28	43.83	43.83	0	-3.078 to 3.078
Treatment	Difference	t	P value	Summary
Day 1	0.5	0.5901	P > 0.05	ns
Day 7	-0.6667	0.7867	P > 0.05	ns
Day 14	-0.8333	0.9834	P > 0.05	ns
Day 21	-0.1667	0.1967	P > 0.05	ns
Day 28	0	0	P > 0.05	ns
Vehicle control vs OUA
Treatment	Vehicle control	OUA	Difference	95% CI of diff.
Day 1	43.67	44.17	0.5	-2.578 to 3.578
Day 7	44.33	64.5	20.17	17.09 to 23.24
Day 14	44	77	33	29.92 to 36.08
Day 21	44	87.33	43.33	40.26 to 46.41
Day 28	43.83	97.5	53.67	50.59 to 56.74
Treatment	Difference	t	P value	Summary
Day 1	0.5	0.5901	P > 0.05	ns
Day 7	20.17	23.8	P<0.001	***
Day 14	33	38.94	P<0.001	***
Day 21	43.33	51.14	P<0.001	***
Day 28	53.67	63.33	P<0.001	***
Vehicle control vs OUA + SNL40
Treatment	Vehicle control	OUA + SNL40	Difference	95% CI of diff.
Day 1	43.67	43.83	0.1667	-2.911 to 3.244
Day 7	44.33	61.17	16.83	13.76 to 19.91
Day 14	44	72	28	24.92 to 31.08
Day 21	44	68.5	24.5	21.42 to 27.58
Day 28	43.83	62.33	18.5	15.42 to 21.58
Treatment	Difference	t	P value	Summary
Day 1	0.1667	0.1967	P > 0.05	ns
Day 7	16.83	19.87	P<0.001	***
Day 14	28	33.04	P<0.001	***
Day 21	24.5	28.91	P<0.001	***
Day 28	18.5	21.83	P<0.001	***
Vehicle control vs OUA + SNL80
Treatment	Vehicle control	OUA + SNL80	Difference	95% CI of diff.
Day 1	43.67	44.17	0.5	-2.578 to 3.578
Day 7	44.33	61.67	17.33	14.26 to 20.41
Day 14	44	70.5	26.5	23.42 to 29.58
Day 21	44	63.5	19.5	16.42 to 22.58
Day 28	43.83	57.17	13.33	10.26 to 16.41
Treatment	Difference	t	P value	Summary
Day 1	0.5	0.5901	P > 0.05	ns
Day 7	17.33	20.46	P<0.001	***
Day 14	26.5	31.27	P<0.001	***
Day 21	19.5	23.01	P<0.001	***
Day 28	13.33	15.73	P<0.001	***
Vehicle control vs OUA + Li60
Treatment	Vehicle control	OUA + Li60	Difference	95% CI of diff.
Day 1	43.67	44.17	0.5	-2.578 to 3.578
Day 7	44.33	62	17.67	14.59 to 20.74
Day 14	44	66.67	22.67	19.59 to 25.74
Day 21	44	59.83	15.83	12.76 to 18.91
Day 28	43.83	51.5	7.667	4.589 to 10.74
Treatment	Difference	t	P value	Summary
Day 1	0.5	0.5901	P > 0.05	ns
Day 7	17.67	20.85	P<0.001	***
Day 14	22.67	26.75	P<0.001	***
Day 21	15.83	18.69	P<0.001	***
Day 28	7.667	9.047	P<0.001	***
Vehicle control vs OUA + SNL80 + Li60
Treatment	Vehicle control	OUA + SNL80 + Li60	Difference	95% CI of diff.
Day 1	43.67	44.17	0.5	-2.578 to 3.578
Day 7	44.33	62.17	17.83	14.76 to 20.91
Day 14	44	65.17	21.17	18.09 to 24.24
Day 21	44	55.83	11.83	8.755 to 14.91
Day 28	43.83	47.5	3.667	0.5888 to 6.745
Treatment	Difference	t	P value	Summary
Day 1	0.5	0.5901	P > 0.05	ns
Day 7	17.83	21.05	P<0.001	***
Day 14	21.17	24.98	P<0.001	***
Day 21	11.83	13.96	P<0.001	***
Day 28	3.667	4.327	P<0.001	***
Sham control vs SNL80 perse
Treatment	Sham control	SNL80 perse	Difference	95% CI of diff.
Day 1	43.83	44.17	0.3333	-2.744 to 3.411
Day 7	43.67	43.67	0	-3.078 to 3.078
Day 14	44.33	43.17	-1.167	-4.245 to 1.911
Day 21	44.17	43.83	-0.3333	-3.411 to 2.744
Day 28	43.67	43.83	0.1667	-2.911 to 3.244
Treatment	Difference	t	P value	Summary
Day 1	0.3333	0.3934	P > 0.05	ns
Day 7	0	0	P > 0.05	ns
Day 14	-1.167	1.377	P > 0.05	ns
Day 21	-0.3333	0.3934	P > 0.05	ns
Day 28	0.1667	0.1967	P > 0.05	ns
Sham control vs OUA
Treatment	Sham control	OUA	Difference	95% CI of diff.
Day 1	43.83	44.17	0.3333	-2.744 to 3.411
Day 7	43.67	64.5	20.83	17.76 to 23.91
Day 14	44.33	77	32.67	29.59 to 35.74
Day 21	44.17	87.33	43.17	40.09 to 46.24
Day 28	43.67	97.5	53.83	50.76 to 56.91
Treatment	Difference	t	P value	Summary
Day 1	0.3333	0.3934	P > 0.05	ns
Day 7	20.83	24.59	P<0.001	***
Day 14	32.67	38.55	P<0.001	***
Day 21	43.17	50.94	P<0.001	***
Day 28	53.83	63.53	P<0.001	***
Sham control vs OUA + SNL40
Treatment	Sham control	OUA + SNL40	Difference	95% CI of diff.
Day 1	43.83	43.83	0	-3.078 to 3.078
Day 7	43.67	61.17	17.5	14.42 to 20.58
Day 14	44.33	72	27.67	24.59 to 30.74
Day 21	44.17	68.5	24.33	21.26 to 27.41
Day 28	43.67	62.33	18.67	15.59 to 21.74
Treatment	Difference	t	P value	Summary
Day 1	0	0	P > 0.05	ns
Day 7	17.5	20.65	P<0.001	***
Day 14	27.67	32.65	P<0.001	***
Day 21	24.33	28.72	P<0.001	***
Day 28	18.67	22.03	P<0.001	***
Sham control vs OUA + SNL80
Treatment	Sham control	OUA + SNL80	Difference	95% CI of diff.
Day 1	43.83	44.17	0.3333	-2.744 to 3.411
Day 7	43.67	61.67	18	14.92 to 21.08
Day 14	44.33	70.5	26.17	23.09 to 29.24
Day 21	44.17	63.5	19.33	16.26 to 22.41
Day 28	43.67	57.17	13.5	10.42 to 16.58
Treatment	Difference	t	P value	Summary
Day 1	0.3333	0.3934	P > 0.05	ns
Day 7	18	21.24	P<0.001	***
Day 14	26.17	30.88	P<0.001	***
Day 21	19.33	22.82	P<0.001	***
Day 28	13.5	15.93	P<0.001	***
Sham control vs OUA + Li60
Treatment	Sham control	OUA + Li60	Difference	95% CI of diff.
Day 1	43.83	44.17	0.3333	-2.744 to 3.411
Day 7	43.67	62	18.33	15.26 to 21.41
Day 14	44.33	66.67	22.33	19.26 to 25.41
Day 21	44.17	59.83	15.67	12.59 to 18.74
Day 28	43.67	51.5	7.833	4.755 to 10.91
Treatment	Difference	t	P value	Summary
Day 1	0.3333	0.3934	P > 0.05	ns
Day 7	18.33	21.64	P<0.001	***
Day 14	22.33	26.36	P<0.001	***
Day 21	15.67	18.49	P<0.001	***
Day 28	7.833	9.244	P<0.001	***
Sham control vs OUA + SNL80 + Li60
Treatment	Sham control	OUA + SNL80 + Li60	Difference	95% CI of diff.
Day 1	43.83	44.17	0.3333	-2.744 to 3.411
Day 7	43.67	62.17	18.5	15.42 to 21.58
Day 14	44.33	65.17	20.83	17.76 to 23.91
Day 21	44.17	55.83	11.67	8.589 to 14.74
Day 28	43.67	47.5	3.833	0.7555 to 6.911
Treatment	Difference	t	P value	Summary
Day 1	0.3333	0.3934	P > 0.05	ns
Day 7	18.5	21.83	P<0.001	***
Day 14	20.83	24.59	P<0.001	***
Day 21	11.67	13.77	P<0.001	***
Day 28	3.833	4.524	P<0.001	***
SNL80 perse vs OUA
Treatment	SNL80 perse	OUA	Difference	95% CI of diff.
Day 1	44.17	44.17	0	-3.078 to 3.078
Day 7	43.67	64.5	20.83	17.76 to 23.91
Day 14	43.17	77	33.83	30.76 to 36.91
Day 21	43.83	87.33	43.5	40.42 to 46.58
Day 28	43.83	97.5	53.67	50.59 to 56.74
Treatment	Difference	t	P value	Summary
Day 1	0	0	P > 0.05	ns
Day 7	20.83	24.59	P<0.001	***
Day 14	33.83	39.93	P<0.001	***
Day 21	43.5	51.33	P<0.001	***
Day 28	53.67	63.33	P<0.001	***
SNL80 perse vs OUA + SNL40
Treatment	SNL80 perse	OUA + SNL40	Difference	95% CI of diff.
Day 1	44.17	43.83	-0.3333	-3.411 to 2.744
Day 7	43.67	61.17	17.5	14.42 to 20.58
Day 14	43.17	72	28.83	25.76 to 31.91
Day 21	43.83	68.5	24.67	21.59 to 27.74
Day 28	43.83	62.33	18.5	15.42 to 21.58
Treatment	Difference	t	P value	Summary
Day 1	-0.3333	0.3934	P > 0.05	ns
Day 7	17.5	20.65	P<0.001	***
Day 14	28.83	34.03	P<0.001	***
Day 21	24.67	29.11	P<0.001	***
Day 28	18.5	21.83	P<0.001	***
SNL80 perse vs OUA + SNL80
Treatment	SNL80 perse	OUA + SNL80	Difference	95% CI of diff.
Day 1	44.17	44.17	0	-3.078 to 3.078
Day 7	43.67	61.67	18	14.92 to 21.08
Day 14	43.17	70.5	27.33	24.26 to 30.41
Day 21	43.83	63.5	19.67	16.59 to 22.74
Day 28	43.83	57.17	13.33	10.26 to 16.41
Treatment	Difference	t	P value	Summary
Day 1	0	0	P > 0.05	ns
Day 7	18	21.24	P<0.001	***
Day 14	27.33	32.26	P<0.001	***
Day 21	19.67	23.21	P<0.001	***
Day 28	13.33	15.73	P<0.001	***
SNL80 perse vs OUA + Li60
Treatment	SNL80 perse	OUA + Li60	Difference	95% CI of diff.
Day 1	44.17	44.17	0	-3.078 to 3.078
Day 7	43.67	62	18.33	15.26 to 21.41
Day 14	43.17	66.67	23.5	20.42 to 26.58
Day 21	43.83	59.83	16	12.92 to 19.08
Day 28	43.83	51.5	7.667	4.589 to 10.74
Treatment	Difference	t	P value	Summary
Day 1	0	0	P > 0.05	ns
Day 7	18.33	21.64	P<0.001	***
Day 14	23.5	27.73	P<0.001	***
Day 21	16	18.88	P<0.001	***
Day 28	7.667	9.047	P<0.001	***
SNL80 perse vs OUA + SNL80 + Li60
Treatment	SNL80 perse	OUA + SNL80 + Li60	Difference	95% CI of diff.
Day 1	44.17	44.17	0	-3.078 to 3.078
Day 7	43.67	62.17	18.5	15.42 to 21.58
Day 14	43.17	65.17	22	18.92 to 25.08
Day 21	43.83	55.83	12	8.922 to 15.08
Day 28	43.83	47.5	3.667	0.5888 to 6.745
Treatment	Difference	t	P value	Summary
Day 1	0	0	P > 0.05	ns
Day 7	18.5	21.83	P<0.001	***
Day 14	22	25.96	P<0.001	***
Day 21	12	14.16	P<0.001	***
Day 28	3.667	4.327	P<0.001	***
OUA vs OUA + SNL40
Treatment	OUA	OUA + SNL40	Difference	95% CI of diff.
Day 1	44.17	43.83	-0.3333	-3.411 to 2.744
Day 7	64.5	61.17	-3.333	-6.411 to -0.2555
Day 14	77	72	-5	-8.078 to -1.922
Day 21	87.33	68.5	-18.83	-21.91 to -15.76
Day 28	97.5	62.33	-35.17	-38.24 to -32.09
Treatment	Difference	t	P value	Summary
Day 1	-0.3333	0.3934	P > 0.05	ns
Day 7	-3.333	3.934	P<0.001	***
Day 14	-5	5.901	P<0.001	***
Day 21	-18.83	22.23	P<0.001	***
Day 28	-35.17	41.5	P<0.001	***
OUA vs OUA + SNL80
Treatment	OUA	OUA + SNL80	Difference	95% CI of diff.
Day 1	44.17	44.17	0	-3.078 to 3.078
Day 7	64.5	61.67	-2.833	-5.911 to 0.2445
Day 14	77	70.5	-6.5	-9.578 to -3.422
Day 21	87.33	63.5	-23.83	-26.91 to -20.76
Day 28	97.5	57.17	-40.33	-43.41 to -37.26
Treatment	Difference	t	P value	Summary
Day 1	0	0	P > 0.05	ns
Day 7	-2.833	3.344	P<0.01	**
Day 14	-6.5	7.671	P<0.001	***
Day 21	-23.83	28.13	P<0.001	***
Day 28	-40.33	47.6	P<0.001	***
OUA vs OUA + Li60
Treatment	OUA	OUA + Li60	Difference	95% CI of diff.
Day 1	44.17	44.17	0	-3.078 to 3.078
Day 7	64.5	62	-2.5	-5.578 to 0.5778
Day 14	77	66.67	-10.33	-13.41 to -7.256
Day 21	87.33	59.83	-27.5	-30.58 to -24.42
Day 28	97.5	51.5	-46	-49.08 to -42.92
Treatment	Difference	t	P value	Summary
Day 1	0	0	P > 0.05	ns
Day 7	-2.5	2.95	P < 0.05	*
Day 14	-10.33	12.19	P<0.001	***
Day 21	-27.5	32.45	P<0.001	***
Day 28	-46	54.28	P<0.001	***
OUA vs OUA + SNL80 + Li60
Treatment	OUA	OUA + SNL80 + Li60	Difference	95% CI of diff.
Day 1	44.17	44.17	0	-3.078 to 3.078
Day 7	64.5	62.17	-2.333	-5.411 to 0.7445
Day 14	77	65.17	-11.83	-14.91 to -8.756
Day 21	87.33	55.83	-31.5	-34.58 to -28.42
Day 28	97.5	47.5	-50	-53.08 to -46.92
Treatment	Difference	t	P value	Summary
Day 1	0	0	P > 0.05	ns
Day 7	-2.333	2.754	P < 0.05	*
Day 14	-11.83	13.96	P<0.001	***
Day 21	-31.5	37.17	P<0.001	***
Day 28	-50	59.01	P<0.001	***
OUA + SNL40 vs OUA + SNL80
Treatment	OUA + SNL40	OUA + SNL80	Difference	95% CI of diff.
Day 1	43.83	44.17	0.3333	-2.744 to 3.411
Day 7	61.17	61.67	0.5	-2.578 to 3.578
Day 14	72	70.5	-1.5	-4.578 to 1.578
Day 21	68.5	63.5	-5	-8.078 to -1.922
Day 28	62.33	57.17	-5.167	-8.244 to -2.089
Treatment	Difference	t	P value	Summary
Day 1	0.3333	0.3934	P > 0.05	ns
Day 7	0.5	0.5901	P > 0.05	ns
Day 14	-1.5	1.77	P > 0.05	ns
Day 21	-5	5.901	P<0.001	***
Day 28	-5.167	6.097	P<0.001	***
OUA + SNL40 vs OUA + Li60
Treatment	OUA + SNL40	OUA + Li60	Difference	95% CI of diff.
Day 1	43.83	44.17	0.3333	-2.744 to 3.411
Day 7	61.17	62	0.8333	-2.245 to 3.911
Day 14	72	66.67	-5.333	-8.411 to -2.256
Day 21	68.5	59.83	-8.667	-11.74 to -5.589
Day 28	62.33	51.5	-10.83	-13.91 to -7.755
Treatment	Difference	t	P value	Summary
Day 1	0.3333	0.3934	P > 0.05	ns
Day 7	0.8333	0.9834	P > 0.05	ns
Day 14	-5.333	6.294	P<0.001	***
Day 21	-8.667	10.23	P<0.001	***
Day 28	-10.83	12.78	P<0.001	***
OUA + SNL40 vs OUA + SNL80 + Li60
Treatment	OUA + SNL40	OUA + SNL80 + Li60	Difference	95% CI of diff.
Day 1	43.83	44.17	0.3333	-2.744 to 3.411
Day 7	61.17	62.17	1	-2.078 to 4.078
Day 14	72	65.17	-6.833	-9.911 to -3.756
Day 21	68.5	55.83	-12.67	-15.74 to -9.589
Day 28	62.33	47.5	-14.83	-17.91 to -11.76
Treatment	Difference	t	P value	Summary
Day 1	0.3333	0.3934	P > 0.05	ns
Day 7	1	1.18	P > 0.05	ns
Day 14	-6.833	8.064	P<0.001	***
Day 21	-12.67	14.95	P<0.001	***
Day 28	-14.83	17.5	P<0.001	***
OUA + SNL80 vs OUA + Li60
Treatment	OUA + SNL80	OUA + Li60	Difference	95% CI of diff.
Day 1	44.17	44.17	0	-3.078 to 3.078
Day 7	61.67	62	0.3333	-2.745 to 3.411
Day 14	70.5	66.67	-3.833	-6.911 to -0.7555
Day 21	63.5	59.83	-3.667	-6.745 to -0.5888
Day 28	57.17	51.5	-5.667	-8.745 to -2.589
Treatment	Difference	t	P value	Summary
Day 1	0	0	P > 0.05	ns
Day 7	0.3333	0.3934	P > 0.05	ns
Day 14	-3.833	4.524	P<0.001	***
Day 21	-3.667	4.327	P<0.001	***
Day 28	-5.667	6.687	P<0.001	***
OUA + SNL80 vs OUA + SNL80 + Li60
Treatment	OUA + SNL80	OUA + SNL80 + Li60	Difference	95% CI of diff.
Day 1	44.17	44.17	0	-3.078 to 3.078
Day 7	61.67	62.17	0.5	-2.578 to 3.578
Day 14	70.5	65.17	-5.333	-8.411 to -2.256
Day 21	63.5	55.83	-7.667	-10.74 to -4.589
Day 28	57.17	47.5	-9.667	-12.74 to -6.589
Treatment	Difference	t	P value	Summary
Day 1	0	0	P > 0.05	ns
Day 7	0.5	0.5901	P > 0.05	ns
Day 14	-5.333	6.294	P<0.001	***
Day 21	-7.667	9.047	P<0.001	***
Day 28	-9.667	11.41	P<0.001	***
OUA + Li60 vs OUA + SNL80 + Li60
Treatment	OUA + Li60	OUA + SNL80 + Li60	Difference	95% CI of diff.
Day 1	44.17	44.17	0	-3.078 to 3.078
Day 7	62	62.17	0.1667	-2.911 to 3.245
Day 14	66.67	65.17	-1.5	-4.578 to 1.578
Day 21	59.83	55.83	-4	-7.078 to -0.9222
Day 28	51.5	47.5	-4	-7.078 to -0.9222
Treatment	Difference	t	P value	Summary
Day 1	0	0	P > 0.05	ns
Day 7	0.1667	0.1967	P > 0.05	ns
Day 14	-1.5	1.77	P > 0.05	ns
Day 21	-4	4.72	P<0.001	***
Day 28	-4	4.72	P<0.001	***
Source of Variation	DF	Sum of Squares	Mean Square
Interaction	28	11600	414.4
Time	4	7748	1937
Treatment	7	24050	3435
Subjects (matching)	40	81.9	2.048
Residual (Error)	160	348.9	2.181
Total	239	43830
Does Time have the same effect at all values of Treatment?
Interaction accounts for 26.47% of the total variance.
F = 190.00. DFn=28 DFd=160
The P value is <0.0001
If there is no interaction overall, there is a less than 0.01% chance of randomly observing so much
interaction in an experiment of this size. The interaction is considered extremely significant.
Since the interaction is statistically significant, the P values that
follow for the row and column effects are difficult to interpret.
Does Treatment affect the result? (Are the curves different?)
Treatment accounts for 54.87% of the total variance (after adjusting for matching).
F = 1677.69. DFn=7 DFd=160
The P value is <0.0001
If Treatment has no effect overall, there is a less than 0.01chance of randomly observing an
effect this big (or bigger) in an experiment of this size. The effect is considered extremely significant.
Does Time affect the result? (Are the curves horizontal?)
Time accounts for 17.68% of the total variance (after adjusting for matching).
F = 888.22. DFn=4 DFd=160
The P value is <0.0001
If Time has no effect overall, there is a less than 0.01chance of randomly observing an
effect this big (or bigger) in an experiment of this size. The effect is considered extremely significant.
Was the matching effective?
F = 0.94. DFn=40 DFd=160
The P value = 0.5792
If matching were not effective overall, there is a 58% chance of randomly observing an
effect this big (or bigger) in an experiment of this size. The effect is considered not significant.

## Sheet: OFT time spent in centre
	Vehicle control						Sham control						SNL80 perse						OUA						OUA + SNL40						OUA + SNL80						OUA + Li60						OUA + SNL80 + Li60
Day 1	2	2	2	2	3	2	3	3	2	2	2	3	2	3	2	3	2	3	2	2	2	3	2	3	3	3	3	2	3	2	2	2	2	3	2	3	3	3	3	2	3	3	3	3	2	2	2	3
Day 7	2	2	2	3	2	2	2	2	2	2	3	2	3	2	2	3	2	3	5	4	4	5	4	4	4	4	3	4	4	4	4	4	3	4	4	4	4	4	4	4	4	3	4	3	4	4	4	3
Day 14	2	2	3	3	3	3	2	2	3	3	2	3	3	3	2	3	2	3	7	6	7	7	8	7	5	6	5	7	6	7	6	6	5	6	6	6	5	4	4	4	4	4	3	3	4	4	4	4
Day 21	2	2	3	2	2	3	2	3	3	2	2	2	3	2	3	2	3	2	8	7	9	9	8	7	6	6	6	6	6	5	5	5	5	4	5	5	3	3	3	4	3	3	2	2	2	2	2	2
Day 28	2	3	2	3	2	2	2	2	2	3	3	2	2	2	3	3	2	2	11	8	10	9	9	10	6	6	5	6	6	6	5	5	5	5	5	4	3	3	3	3	4	3	1	3	1	2	2	2
	Vehicle control	Sham control	SNL80 perse	OUA	OUA + SNL40	OUA + SNL80	OUA + Li60	OUA + SNL80 + Li60
Number of values	5	5	5	5	5	5	5	5
Minimum	2.167	2.167	2.333	2.333	2.667	2.333	2.833	1.833
25% Percentile	2.167	2.25	2.417	3.333	3.25	3.083	3	1.917
Median	2.333	2.333	2.5	7	5.833	4.833	3.167	2.5
75% Percentile	2.5	2.5	2.583	8.75	5.917	5.333	4	3.667
Maximum	2.667	2.5	2.667	9.5	6	5.833	4.167	3.667
Mean	2.333	2.367	2.5	6.233	4.833	4.333	3.433	2.733
Std. Deviation	0.2041	0.1394	0.1179	2.881	1.505	1.323	0.5477	0.8866
Std. Error	0.09129	0.06236	0.0527	1.288	0.6729	0.5916	0.2449	0.3965
Lower 95% CI of mean	2.08	2.194	2.354	2.656	2.965	2.691	2.753	1.632
Upper 95% CI of mean	2.587	2.54	2.646	9.811	6.702	5.976	4.113	3.834
KS normality test
KS distance	0.3	0.2305	0.3	0.2049	0.3468	0.2473	0.2868	0.2537
P value	> 0.10	> 0.10	> 0.10	> 0.10	0.049	> 0.10	> 0.10	> 0.10
Passed normality test (alpha=0.05)?	Yes	Yes	Yes	Yes	No	Yes	Yes	Yes
P value summary	ns	ns	ns	ns	*	ns	ns	ns
Sum	11.67	11.83	12.5	31.17	24.17	21.67	17.17	13.67
Parameter
Table Analyzed	Data 1
Two-way RM ANOVA	Matching by cols
Source of Variation	% of total variation	P value
Interaction	27.62	< 0.0001
Time	12.61	< 0.0001
Treatment	52.65	< 0.0001
Subjects (matching)	1.2648	0.698
Source of Variation	P value summary	Significant?
Interaction	***	Yes
Time	***	Yes
Treatment	***	Yes
Subjects (matching)	ns	No
Source of Variation	Df	Sum-of-squares	Mean square	F
Interaction	28	222.042	7.93006	26.996
Time	4	101.358	25.3396	86.2624
Treatment	7	423.229	60.4613	237.881
Subjects (matching)	40	10.1667	0.254167	0.865248
Residual	160	47	0.29375
Number of missing values	0
Bonferroni posttests
Vehicle control vs Sham control
Treatment	Vehicle control	Sham control	Difference	95% CI of diff.
Day 1	2.16667	2.5	0.333333	-0.787813 to 1.45448
Day 7	2.16667	2.16667	0	-1.12115 to 1.12115
Day 14	2.66667	2.5	-0.166667	-1.28781 to 0.954479
Day 21	2.33333	2.33333	0	-1.12115 to 1.12115
Day 28	2.33333	2.33333	0	-1.12115 to 1.12115
Treatment	Difference	t	P value	Summary
Day 1	0.333333	1.0799	P > 0.05	ns
Day 7	0	0	P > 0.05	ns
Day 14	-0.166667	0.53995	P > 0.05	ns
Day 21	0	0	P > 0.05	ns
Day 28	0	0	P > 0.05	ns
Vehicle control vs SNL80 perse
Treatment	Vehicle control	SNL80 perse	Difference	95% CI of diff.
Day 1	2.16667	2.5	0.333333	-0.787813 to 1.45448
Day 7	2.16667	2.5	0.333333	-0.787813 to 1.45448
Day 14	2.66667	2.66667	0	-1.12115 to 1.12115
Day 21	2.33333	2.5	0.166667	-0.954479 to 1.28781
Day 28	2.33333	2.33333	0	-1.12115 to 1.12115
Treatment	Difference	t	P value	Summary
Day 1	0.333333	1.0799	P > 0.05	ns
Day 7	0.333333	1.0799	P > 0.05	ns
Day 14	0	0	P > 0.05	ns
Day 21	0.166667	0.53995	P > 0.05	ns
Day 28	0	0	P > 0.05	ns
Vehicle control vs OUA
Treatment	Vehicle control	OUA	Difference	95% CI of diff.
Day 1	2.16667	2.33333	0.166667	-0.954480 to 1.28781
Day 7	2.16667	4.33333	2.16667	1.04552 to 3.28781
Day 14	2.66667	7	4.33333	3.21219 to 5.45448
Day 21	2.33333	8	5.66667	4.54552 to 6.78781
Day 28	2.33333	9.5	7.16667	6.04552 to 8.28781
Treatment	Difference	t	P value	Summary
Day 1	0.166667	0.539949	P > 0.05	ns
Day 7	2.16667	7.01934	P<0.001	***
Day 14	4.33333	14.0387	P<0.001	***
Day 21	5.66667	18.3583	P<0.001	***
Day 28	7.16667	23.2178	P<0.001	***
Vehicle control vs OUA + SNL40
Treatment	Vehicle control	OUA + SNL40	Difference	95% CI of diff.
Day 1	2.16667	2.66667	0.5	-0.621146 to 1.62115
Day 7	2.16667	3.83333	1.66667	0.545521 to 2.78781
Day 14	2.66667	6	3.33333	2.21219 to 4.45448
Day 21	2.33333	5.83333	3.5	2.37885 to 4.62115
Day 28	2.33333	5.83333	3.5	2.37885 to 4.62115
Treatment	Difference	t	P value	Summary
Day 1	0.5	1.61985	P > 0.05	ns
Day 7	1.66667	5.39949	P<0.001	***
Day 14	3.33333	10.799	P<0.001	***
Day 21	3.5	11.3389	P<0.001	***
Day 28	3.5	11.3389	P<0.001	***
Vehicle control vs OUA + SNL80
Treatment	Vehicle control	OUA + SNL80	Difference	95% CI of diff.
Day 1	2.16667	2.33333	0.166667	-0.954480 to 1.28781
Day 7	2.16667	3.83333	1.66667	0.545521 to 2.78781
Day 14	2.66667	5.83333	3.16667	2.04552 to 4.28781
Day 21	2.33333	4.83333	2.5	1.37885 to 3.62115
Day 28	2.33333	4.83333	2.5	1.37885 to 3.62115
Treatment	Difference	t	P value	Summary
Day 1	0.166667	0.539949	P > 0.05	ns
Day 7	1.66667	5.39949	P<0.001	***
Day 14	3.16667	10.259	P<0.001	***
Day 21	2.5	8.09924	P<0.001	***
Day 28	2.5	8.09924	P<0.001	***
Vehicle control vs OUA + Li60
Treatment	Vehicle control	OUA + Li60	Difference	95% CI of diff.
Day 1	2.16667	2.83333	0.666667	-0.454480 to 1.78781
Day 7	2.16667	3.83333	1.66667	0.545521 to 2.78781
Day 14	2.66667	4.16667	1.5	0.378854 to 2.62115
Day 21	2.33333	3.16667	0.833334	-0.287813 to 1.95448
Day 28	2.33333	3.16667	0.833334	-0.287813 to 1.95448
Treatment	Difference	t	P value	Summary
Day 1	0.666667	2.1598	P > 0.05	ns
Day 7	1.66667	5.39949	P<0.001	***
Day 14	1.5	4.85954	P<0.001	***
Day 21	0.833334	2.69975	P < 0.05	*
Day 28	0.833334	2.69975	P < 0.05	*
Vehicle control vs OUA + SNL80 + Li60
Treatment	Vehicle control	OUA + SNL80 + Li60	Difference	95% CI of diff.
Day 1	2.16667	2.5	0.333333	-0.787813 to 1.45448
Day 7	2.16667	3.66667	1.5	0.378854 to 2.62115
Day 14	2.66667	3.66667	1	-0.121146 to 2.12115
Day 21	2.33333	2	-0.333333	-1.45448 to 0.787813
Day 28	2.33333	1.83333	-0.5	-1.62115 to 0.621146
Treatment	Difference	t	P value	Summary
Day 1	0.333333	1.0799	P > 0.05	ns
Day 7	1.5	4.85954	P<0.001	***
Day 14	1	3.2397	P<0.01	**
Day 21	-0.333333	1.0799	P > 0.05	ns
Day 28	-0.5	1.61985	P > 0.05	ns
Sham control vs SNL80 perse
Treatment	Sham control	SNL80 perse	Difference	95% CI of diff.
Day 1	2.5	2.5	0	-1.12115 to 1.12115
Day 7	2.16667	2.5	0.333333	-0.787813 to 1.45448
Day 14	2.5	2.66667	0.166667	-0.954479 to 1.28781
Day 21	2.33333	2.5	0.166667	-0.954479 to 1.28781
Day 28	2.33333	2.33333	0	-1.12115 to 1.12115
Treatment	Difference	t	P value	Summary
Day 1	0	0	P > 0.05	ns
Day 7	0.333333	1.0799	P > 0.05	ns
Day 14	0.166667	0.53995	P > 0.05	ns
Day 21	0.166667	0.53995	P > 0.05	ns
Day 28	0	0	P > 0.05	ns
Sham control vs OUA
Treatment	Sham control	OUA	Difference	95% CI of diff.
Day 1	2.5	2.33333	-0.166667	-1.28781 to 0.954479
Day 7	2.16667	4.33333	2.16667	1.04552 to 3.28781
Day 14	2.5	7	4.5	3.37885 to 5.62115
Day 21	2.33333	8	5.66667	4.54552 to 6.78781
Day 28	2.33333	9.5	7.16667	6.04552 to 8.28781
Treatment	Difference	t	P value	Summary
Day 1	-0.166667	0.53995	P > 0.05	ns
Day 7	2.16667	7.01934	P<0.001	***
Day 14	4.5	14.5786	P<0.001	***
Day 21	5.66667	18.3583	P<0.001	***
Day 28	7.16667	23.2178	P<0.001	***
Sham control vs OUA + SNL40
Treatment	Sham control	OUA + SNL40	Difference	95% CI of diff.
Day 1	2.5	2.66667	0.166667	-0.954479 to 1.28781
Day 7	2.16667	3.83333	1.66667	0.545521 to 2.78781
Day 14	2.5	6	3.5	2.37885 to 4.62115
Day 21	2.33333	5.83333	3.5	2.37885 to 4.62115
Day 28	2.33333	5.83333	3.5	2.37885 to 4.62115
Treatment	Difference	t	P value	Summary
Day 1	0.166667	0.53995	P > 0.05	ns
Day 7	1.66667	5.39949	P<0.001	***
Day 14	3.5	11.3389	P<0.001	***
Day 21	3.5	11.3389	P<0.001	***
Day 28	3.5	11.3389	P<0.001	***
Sham control vs OUA + SNL80
Treatment	Sham control	OUA + SNL80	Difference	95% CI of diff.
Day 1	2.5	2.33333	-0.166667	-1.28781 to 0.954479
Day 7	2.16667	3.83333	1.66667	0.545521 to 2.78781
Day 14	2.5	5.83333	3.33333	2.21219 to 4.45448
Day 21	2.33333	4.83333	2.5	1.37885 to 3.62115
Day 28	2.33333	4.83333	2.5	1.37885 to 3.62115
Treatment	Difference	t	P value	Summary
Day 1	-0.166667	0.53995	P > 0.05	ns
Day 7	1.66667	5.39949	P<0.001	***
Day 14	3.33333	10.799	P<0.001	***
Day 21	2.5	8.09924	P<0.001	***
Day 28	2.5	8.09924	P<0.001	***
Sham control vs OUA + Li60
Treatment	Sham control	OUA + Li60	Difference	95% CI of diff.
Day 1	2.5	2.83333	0.333333	-0.787813 to 1.45448
Day 7	2.16667	3.83333	1.66667	0.545521 to 2.78781
Day 14	2.5	4.16667	1.66667	0.545521 to 2.78781
Day 21	2.33333	3.16667	0.833334	-0.287813 to 1.95448
Day 28	2.33333	3.16667	0.833334	-0.287813 to 1.95448
Treatment	Difference	t	P value	Summary
Day 1	0.333333	1.0799	P > 0.05	ns
Day 7	1.66667	5.39949	P<0.001	***
Day 14	1.66667	5.39949	P<0.001	***
Day 21	0.833334	2.69975	P < 0.05	*
Day 28	0.833334	2.69975	P < 0.05	*
Sham control vs OUA + SNL80 + Li60
Treatment	Sham control	OUA + SNL80 + Li60	Difference	95% CI of diff.
Day 1	2.5	2.5	0	-1.12115 to 1.12115
Day 7	2.16667	3.66667	1.5	0.378854 to 2.62115
Day 14	2.5	3.66667	1.16667	0.0455208 to 2.28781
Day 21	2.33333	2	-0.333333	-1.45448 to 0.787813
Day 28	2.33333	1.83333	-0.5	-1.62115 to 0.621146
Treatment	Difference	t	P value	Summary
Day 1	0	0	P > 0.05	ns
Day 7	1.5	4.85954	P<0.001	***
Day 14	1.16667	3.77965	P<0.01	**
Day 21	-0.333333	1.0799	P > 0.05	ns
Day 28	-0.5	1.61985	P > 0.05	ns
SNL80 perse vs OUA
Treatment	SNL80 perse	OUA	Difference	95% CI of diff.
Day 1	2.5	2.33333	-0.166667	-1.28781 to 0.954479
Day 7	2.5	4.33333	1.83333	0.712188 to 2.95448
Day 14	2.66667	7	4.33333	3.21219 to 5.45448
Day 21	2.5	8	5.5	4.37885 to 6.62115
Day 28	2.33333	9.5	7.16667	6.04552 to 8.28781
Treatment	Difference	t	P value	Summary
Day 1	-0.166667	0.53995	P > 0.05	ns
Day 7	1.83333	5.93944	P<0.001	***
Day 14	4.33333	14.0387	P<0.001	***
Day 21	5.5	17.8183	P<0.001	***
Day 28	7.16667	23.2178	P<0.001	***
SNL80 perse vs OUA + SNL40
Treatment	SNL80 perse	OUA + SNL40	Difference	95% CI of diff.
Day 1	2.5	2.66667	0.166667	-0.954479 to 1.28781
Day 7	2.5	3.83333	1.33333	0.212187 to 2.45448
Day 14	2.66667	6	3.33333	2.21219 to 4.45448
Day 21	2.5	5.83333	3.33333	2.21219 to 4.45448
Day 28	2.33333	5.83333	3.5	2.37885 to 4.62115
Treatment	Difference	t	P value	Summary
Day 1	0.166667	0.53995	P > 0.05	ns
Day 7	1.33333	4.31959	P<0.001	***
Day 14	3.33333	10.799	P<0.001	***
Day 21	3.33333	10.799	P<0.001	***
Day 28	3.5	11.3389	P<0.001	***
SNL80 perse vs OUA + SNL80
Treatment	SNL80 perse	OUA + SNL80	Difference	95% CI of diff.
Day 1	2.5	2.33333	-0.166667	-1.28781 to 0.954479
Day 7	2.5	3.83333	1.33333	0.212187 to 2.45448
Day 14	2.66667	5.83333	3.16667	2.04552 to 4.28781
Day 21	2.5	4.83333	2.33333	1.21219 to 3.45448
Day 28	2.33333	4.83333	2.5	1.37885 to 3.62115
Treatment	Difference	t	P value	Summary
Day 1	-0.166667	0.53995	P > 0.05	ns
Day 7	1.33333	4.31959	P<0.001	***
Day 14	3.16667	10.259	P<0.001	***
Day 21	2.33333	7.55929	P<0.001	***
Day 28	2.5	8.09924	P<0.001	***
SNL80 perse vs OUA + Li60
Treatment	SNL80 perse	OUA + Li60	Difference	95% CI of diff.
Day 1	2.5	2.83333	0.333333	-0.787813 to 1.45448
Day 7	2.5	3.83333	1.33333	0.212187 to 2.45448
Day 14	2.66667	4.16667	1.5	0.378854 to 2.62115
Day 21	2.5	3.16667	0.666667	-0.454479 to 1.78781
Day 28	2.33333	3.16667	0.833334	-0.287813 to 1.95448
Treatment	Difference	t	P value	Summary
Day 1	0.333333	1.0799	P > 0.05	ns
Day 7	1.33333	4.31959	P<0.001	***
Day 14	1.5	4.85954	P<0.001	***
Day 21	0.666667	2.1598	P > 0.05	ns
Day 28	0.833334	2.69975	P < 0.05	*
SNL80 perse vs OUA + SNL80 + Li60
Treatment	SNL80 perse	OUA + SNL80 + Li60	Difference	95% CI of diff.
Day 1	2.5	2.5	0	-1.12115 to 1.12115
Day 7	2.5	3.66667	1.16667	0.0455208 to 2.28781
Day 14	2.66667	3.66667	1	-0.121146 to 2.12115
Day 21	2.5	2	-0.5	-1.62115 to 0.621146
Day 28	2.33333	1.83333	-0.5	-1.62115 to 0.621146
Treatment	Difference	t	P value	Summary
Day 1	0	0	P > 0.05	ns
Day 7	1.16667	3.77965	P<0.01	**
Day 14	1	3.2397	P<0.01	**
Day 21	-0.5	1.61985	P > 0.05	ns
Day 28	-0.5	1.61985	P > 0.05	ns
OUA vs OUA + SNL40
Treatment	OUA	OUA + SNL40	Difference	95% CI of diff.
Day 1	2.33333	2.66667	0.333334	-0.787813 to 1.45448
Day 7	4.33333	3.83333	-0.5	-1.62115 to 0.621146
Day 14	7	6	-1	-2.12115 to 0.121146
Day 21	8	5.83333	-2.16667	-3.28781 to -1.04552
Day 28	9.5	5.83333	-3.66667	-4.78781 to -2.54552
Treatment	Difference	t	P value	Summary
Day 1	0.333334	1.0799	P > 0.05	ns
Day 7	-0.5	1.61985	P > 0.05	ns
Day 14	-1	3.2397	P<0.01	**
Day 21	-2.16667	7.01934	P<0.001	***
Day 28	-3.66667	11.8789	P<0.001	***
OUA vs OUA + SNL80
Treatment	OUA	OUA + SNL80	Difference	95% CI of diff.
Day 1	2.33333	2.33333	0	-1.12115 to 1.12115
Day 7	4.33333	3.83333	-0.5	-1.62115 to 0.621146
Day 14	7	5.83333	-1.16667	-2.28781 to -0.0455205
Day 21	8	4.83333	-3.16667	-4.28781 to -2.04552
Day 28	9.5	4.83333	-4.66667	-5.78781 to -3.54552
Treatment	Difference	t	P value	Summary
Day 1	0	0	P > 0.05	ns
Day 7	-0.5	1.61985	P > 0.05	ns
Day 14	-1.16667	3.77964	P<0.01	**
Day 21	-3.16667	10.259	P<0.001	***
Day 28	-4.66667	15.1186	P<0.001	***
OUA vs OUA + Li60
Treatment	OUA	OUA + Li60	Difference	95% CI of diff.
Day 1	2.33333	2.83333	0.5	-0.621146 to 1.62115
Day 7	4.33333	3.83333	-0.5	-1.62115 to 0.621146
Day 14	7	4.16667	-2.83333	-3.95448 to -1.71219
Day 21	8	3.16667	-4.83333	-5.95448 to -3.71219
Day 28	9.5	3.16667	-6.33333	-7.45448 to -5.21219
Treatment	Difference	t	P value	Summary
Day 1	0.5	1.61985	P > 0.05	ns
Day 7	-0.5	1.61985	P > 0.05	ns
Day 14	-2.83333	9.17914	P<0.001	***
Day 21	-4.83333	15.6585	P<0.001	***
Day 28	-6.33333	20.5181	P<0.001	***
OUA vs OUA + SNL80 + Li60
Treatment	OUA	OUA + SNL80 + Li60	Difference	95% CI of diff.
Day 1	2.33333	2.5	0.166667	-0.954479 to 1.28781
Day 7	4.33333	3.66667	-0.666667	-1.78781 to 0.454479
Day 14	7	3.66667	-3.33333	-4.45448 to -2.21219
Day 21	8	2	-6	-7.12115 to -4.87885
Day 28	9.5	1.83333	-7.66667	-8.78781 to -6.54552
Treatment	Difference	t	P value	Summary
Day 1	0.166667	0.53995	P > 0.05	ns
Day 7	-0.666667	2.1598	P > 0.05	ns
Day 14	-3.33333	10.799	P<0.001	***
Day 21	-6	19.4382	P<0.001	***
Day 28	-7.66667	24.8377	P<0.001	***
OUA + SNL40 vs OUA + SNL80
Treatment	OUA + SNL40	OUA + SNL80	Difference	95% CI of diff.
Day 1	2.66667	2.33333	-0.333334	-1.45448 to 0.787813
Day 7	3.83333	3.83333	0	-1.12115 to 1.12115
Day 14	6	5.83333	-0.166667	-1.28781 to 0.954480
Day 21	5.83333	4.83333	-1	-2.12115 to 0.121146
Day 28	5.83333	4.83333	-1	-2.12115 to 0.121146
Treatment	Difference	t	P value	Summary
Day 1	-0.333334	1.0799	P > 0.05	ns
Day 7	0	0	P > 0.05	ns
Day 14	-0.166667	0.539949	P > 0.05	ns
Day 21	-1	3.2397	P<0.01	**
Day 28	-1	3.2397	P<0.01	**
OUA + SNL40 vs OUA + Li60
Treatment	OUA + SNL40	OUA + Li60	Difference	95% CI of diff.
Day 1	2.66667	2.83333	0.166667	-0.954480 to 1.28781
Day 7	3.83333	3.83333	0	-1.12115 to 1.12115
Day 14	6	4.16667	-1.83333	-2.95448 to -0.712188
Day 21	5.83333	3.16667	-2.66667	-3.78781 to -1.54552
Day 28	5.83333	3.16667	-2.66667	-3.78781 to -1.54552
Treatment	Difference	t	P value	Summary
Day 1	0.166667	0.539949	P > 0.05	ns
Day 7	0	0	P > 0.05	ns
Day 14	-1.83333	5.93944	P<0.001	***
Day 21	-2.66667	8.63919	P<0.001	***
Day 28	-2.66667	8.63919	P<0.001	***
OUA + SNL40 vs OUA + SNL80 + Li60
Treatment	OUA + SNL40	OUA + SNL80 + Li60	Difference	95% CI of diff.
Day 1	2.66667	2.5	-0.166667	-1.28781 to 0.954479
Day 7	3.83333	3.66667	-0.166667	-1.28781 to 0.954480
Day 14	6	3.66667	-2.33333	-3.45448 to -1.21219
Day 21	5.83333	2	-3.83333	-4.95448 to -2.71219
Day 28	5.83333	1.83333	-4	-5.12115 to -2.87885
Treatment	Difference	t	P value	Summary
Day 1	-0.166667	0.53995	P > 0.05	ns
Day 7	-0.166667	0.539949	P > 0.05	ns
Day 14	-2.33333	7.55929	P<0.001	***
Day 21	-3.83333	12.4188	P<0.001	***
Day 28	-4	12.9588	P<0.001	***
OUA + SNL80 vs OUA + Li60
Treatment	OUA + SNL80	OUA + Li60	Difference	95% CI of diff.
Day 1	2.33333	2.83333	0.5	-0.621146 to 1.62115
Day 7	3.83333	3.83333	0	-1.12115 to 1.12115
Day 14	5.83333	4.16667	-1.66667	-2.78781 to -0.545521
Day 21	4.83333	3.16667	-1.66667	-2.78781 to -0.545521
Day 28	4.83333	3.16667	-1.66667	-2.78781 to -0.545521
Treatment	Difference	t	P value	Summary
Day 1	0.5	1.61985	P > 0.05	ns
Day 7	0	0	P > 0.05	ns
Day 14	-1.66667	5.39949	P<0.001	***
Day 21	-1.66667	5.39949	P<0.001	***
Day 28	-1.66667	5.39949	P<0.001	***
OUA + SNL80 vs OUA + SNL80 + Li60
Treatment	OUA + SNL80	OUA + SNL80 + Li60	Difference	95% CI of diff.
Day 1	2.33333	2.5	0.166667	-0.954479 to 1.28781
Day 7	3.83333	3.66667	-0.166667	-1.28781 to 0.954480
Day 14	5.83333	3.66667	-2.16667	-3.28781 to -1.04552
Day 21	4.83333	2	-2.83333	-3.95448 to -1.71219
Day 28	4.83333	1.83333	-3	-4.12115 to -1.87885
Treatment	Difference	t	P value	Summary
Day 1	0.166667	0.53995	P > 0.05	ns
Day 7	-0.166667	0.539949	P > 0.05	ns
Day 14	-2.16667	7.01934	P<0.001	***
Day 21	-2.83333	9.17914	P<0.001	***
Day 28	-3	9.71909	P<0.001	***
OUA + Li60 vs OUA + SNL80 + Li60
Treatment	OUA + Li60	OUA + SNL80 + Li60	Difference	95% CI of diff.
Day 1	2.83333	2.5	-0.333333	-1.45448 to 0.787813
Day 7	3.83333	3.66667	-0.166667	-1.28781 to 0.954480
Day 14	4.16667	3.66667	-0.5	-1.62115 to 0.621146
Day 21	3.16667	2	-1.16667	-2.28781 to -0.0455208
Day 28	3.16667	1.83333	-1.33333	-2.45448 to -0.212187
Treatment	Difference	t	P value	Summary
Day 1	-0.333333	1.0799	P > 0.05	ns
Day 7	-0.166667	0.539949	P > 0.05	ns
Day 14	-0.5	1.61985	P > 0.05	ns
Day 21	-1.16667	3.77965	P<0.01	**
Day 28	-1.33333	4.31959	P<0.001	***
Source of Variation	DF	Sum of Squares	Mean Square
Interaction	28	222.042	7.93006
Time	4	101.358	25.3396
Treatment	7	423.229	60.4613
Subjects (matching)	40	10.1667	0.254167
Residual (Error)	160	47	0.29375
Total	239	803.796
Does Time have the same effect at all values of Treatment?
Interaction accounts for 27.62% of the total variance.
F = 27.00. DFn=28 DFd=160
The P value is <0.0001
If there is no interaction overall, there is a less than 0.01% chance of randomly observing so much
interaction in an experiment of this size. The interaction is considered extremely significant.
Since the interaction is statistically significant, the P values that
follow for the row and column effects are difficult to interpret.
Does Treatment affect the result? (Are the curves different?)
Treatment accounts for 52.65% of the total variance (after adjusting for matching).
F = 237.88. DFn=7 DFd=160
The P value is <0.0001
If Treatment has no effect overall, there is a less than 0.01chance of randomly observing an
effect this big (or bigger) in an experiment of this size. The effect is considered extremely significant.
Does Time affect the result? (Are the curves horizontal?)
Time accounts for 12.61% of the total variance (after adjusting for matching).
F = 86.26. DFn=4 DFd=160
The P value is <0.0001
If Time has no effect overall, there is a less than 0.01chance of randomly observing an
effect this big (or bigger) in an experiment of this size. The effect is considered extremely significant.
Was the matching effective?
F = 0.87. DFn=40 DFd=160
The P value = 0.6980
If matching were not effective overall, there is a 70% chance of randomly observing an
effect this big (or bigger) in an experiment of this size. The effect is considered not significant.

## Sheet: Locomotor
	Vehicle control						Sham control						SNL80 perse						OUA						OUA + SNL40						OUA + SNL80						OUA + Li60						OUA + SNL80 + Li60
Day 1	252	250	257	259	255	254	260	253	257	252	250	256	255	259	253	251	257	257	252	256	254	260	255	258	251	250	256	259	254	257	256	253	255	250	252	259	258	260	254	250	253	257	256	255	251	257	260	259
Day 9	253	259	252	256	260	257	250	252	256	258	260	257	251	253	255	259	257	260	305	302	310	307	304	300	299	302	305	300	298	301	298	300	303	305	301	304	305	301	299	300	298	302	302	301	299	300	298	300
Day 18	257	253	256	259	258	260	253	256	259	252	255	258	259	255	253	251	258	252	363	369	365	370	361	367	348	348	347	350	348	348	345	345	344	345	343	344	322	325	324	321	323	320	315	312	314	311	314	315
Day 27	255	251	257	254	250	258	257	253	255	251	260	252	253	256	259	260	255	257	402	407	400	408	410	404	337	335	340	337	336	339	323	320	321	324	323	325	340	300	302	305	301	303	290	294	291	295	293	292
	Vehicle control	Sham control	SNL80 perse	OUA	OUA + SNL40	OUA + SNL80	OUA + Li60	OUA + SNL80 + Li60
Number of values	4	4	4	4	4	4	4	4
Minimum	254.2	254.7	254.7	255.8	254.5	254.2	255.3	256.3
25% Percentile	254.3	254.7	254.8	268	266.1	266.1	266.7	265.4
Median	255.3	255.1	255.6	335.3	319.1	312.3	304.7	296.3
75% Percentile	256.9	255.5	256.5	395.3	345.5	338.9	319	310.1
Maximum	257.2	255.5	256.7	405.2	348.2	344.3	322.5	313.5
Mean	255.5	255.1	255.6	332.9	310.2	305.8	296.8	290.6
Std. Deviation	1.414	0.4811	0.843	65.94	42.3	38.52	29.06	24.43
Std. Error	0.7071	0.2406	0.4215	32.97	21.15	19.26	14.53	12.22
Lower 95% CI of mean	253.2	254.3	254.3	228	242.9	244.5	250.6	251.7
Upper 95% CI of mean	257.8	255.8	257	437.8	377.5	367	343	329.5
KS normality test
KS distance	N too small	N too small	N too small	N too small	N too small	N too small	N too small	N too small
P value
Passed normality test (alpha=0.05)?
P value summary
Sum	1022	1020	1023	1332	1241	1223	1187	1162
Parameter
Table Analyzed	Data 1
Two-way RM ANOVA	Matching by cols
Source of Variation	% of total variation	P value
Interaction	25.55	< 0.0001
Time	26.76	< 0.0001
Treatment	46.89	< 0.0001
Subjects (matching)	0.2324	0.1899
Source of Variation	P value summary	Significant?
Interaction	***	Yes
Time	***	Yes
Treatment	***	Yes
Subjects (matching)	ns	No
Source of Variation	Df	Sum-of-squares	Mean square	F
Interaction	21	79700	3795	259.1
Time	3	83470	27820	1899
Treatment	7	146200	20890	1153
Subjects (matching)	40	724.8	18.12	1.237
Residual	120	1758	14.65
Number of missing values	0
Bonferroni posttests
Vehicle control vs Sham control
Treatment	Vehicle control	Sham control	Difference	95% CI of diff.
Day 1	254.5	254.7	0.1667	-7.988 to 8.321
Day 9	256.2	255.5	-0.6667	-8.821 to 7.488
Day 18	257.2	255.5	-1.667	-9.821 to 6.488
Day 27	254.2	254.7	0.5	-7.654 to 8.654
Treatment	Difference	t	P value	Summary
Day 1	0.1667	0.07329	P > 0.05	ns
Day 9	-0.6667	0.2931	P > 0.05	ns
Day 18	-1.667	0.7328	P > 0.05	ns
Day 27	0.5	0.2199	P > 0.05	ns
Vehicle control vs SNL80 perse
Treatment	Vehicle control	SNL80 perse	Difference	95% CI of diff.
Day 1	254.5	255.3	0.8333	-7.321 to 8.988
Day 9	256.2	255.8	-0.3333	-8.488 to 7.821
Day 18	257.2	254.7	-2.5	-10.65 to 5.654
Day 27	254.2	256.7	2.5	-5.654 to 10.65
Treatment	Difference	t	P value	Summary
Day 1	0.8333	0.3664	P > 0.05	ns
Day 9	-0.3333	0.1466	P > 0.05	ns
Day 18	-2.5	1.099	P > 0.05	ns
Day 27	2.5	1.099	P > 0.05	ns
Vehicle control vs OUA
Treatment	Vehicle control	OUA	Difference	95% CI of diff.
Day 1	254.5	255.8	1.333	-6.821 to 9.488
Day 9	256.2	304.7	48.5	40.35 to 56.65
Day 18	257.2	365.8	108.7	100.5 to 116.8
Day 27	254.2	405.2	151	142.8 to 159.2
Treatment	Difference	t	P value	Summary
Day 1	1.333	0.5863	P > 0.05	ns
Day 9	48.5	21.33	P<0.001	***
Day 18	108.7	47.78	P<0.001	***
Day 27	151	66.4	P<0.001	***
Vehicle control vs OUA + SNL40
Treatment	Vehicle control	OUA + SNL40	Difference	95% CI of diff.
Day 1	254.5	254.5	0	-8.154 to 8.154
Day 9	256.2	300.8	44.67	36.51 to 52.82
Day 18	257.2	348.2	91	82.85 to 99.15
Day 27	254.2	337.3	83.17	75.01 to 91.32
Treatment	Difference	t	P value	Summary
Day 1	0	0	P > 0.05	ns
Day 9	44.67	19.64	P<0.001	***
Day 18	91	40.01	P<0.001	***
Day 27	83.17	36.57	P<0.001	***
Vehicle control vs OUA + SNL80
Treatment	Vehicle control	OUA + SNL80	Difference	95% CI of diff.
Day 1	254.5	254.2	-0.3333	-8.488 to 7.821
Day 9	256.2	301.8	45.67	37.51 to 53.82
Day 18	257.2	344.3	87.17	79.01 to 95.32
Day 27	254.2	322.7	68.5	60.35 to 76.65
Treatment	Difference	t	P value	Summary
Day 1	-0.3333	0.1466	P > 0.05	ns
Day 9	45.67	20.08	P<0.001	***
Day 18	87.17	38.33	P<0.001	***
Day 27	68.5	30.12	P<0.001	***
Vehicle control vs OUA + Li60
Treatment	Vehicle control	OUA + Li60	Difference	95% CI of diff.
Day 1	254.5	255.3	0.8333	-7.321 to 8.988
Day 9	256.2	300.8	44.67	36.51 to 52.82
Day 18	257.2	322.5	65.33	57.18 to 73.49
Day 27	254.2	308.5	54.33	46.18 to 62.49
Treatment	Difference	t	P value	Summary
Day 1	0.8333	0.3664	P > 0.05	ns
Day 9	44.67	19.64	P<0.001	***
Day 18	65.33	28.73	P<0.001	***
Day 27	54.33	23.89	P<0.001	***
Vehicle control vs OUA + SNL80 + Li60
Treatment	Vehicle control	OUA + SNL80 + Li60	Difference	95% CI of diff.
Day 1	254.5	256.3	1.833	-6.321 to 9.988
Day 9	256.2	300	43.83	35.68 to 51.99
Day 18	257.2	313.5	56.33	48.18 to 64.49
Day 27	254.2	292.5	38.33	30.18 to 46.49
Treatment	Difference	t	P value	Summary
Day 1	1.833	0.8061	P > 0.05	ns
Day 9	43.83	19.27	P<0.001	***
Day 18	56.33	24.77	P<0.001	***
Day 27	38.33	16.86	P<0.001	***
Sham control vs SNL80 perse
Treatment	Sham control	SNL80 perse	Difference	95% CI of diff.
Day 1	254.7	255.3	0.6667	-7.488 to 8.821
Day 9	255.5	255.8	0.3333	-7.821 to 8.488
Day 18	255.5	254.7	-0.8333	-8.988 to 7.321
Day 27	254.7	256.7	2	-6.154 to 10.15
Treatment	Difference	t	P value	Summary
Day 1	0.6667	0.2931	P > 0.05	ns
Day 9	0.3333	0.1466	P > 0.05	ns
Day 18	-0.8333	0.3664	P > 0.05	ns
Day 27	2	0.8794	P > 0.05	ns
Sham control vs OUA
Treatment	Sham control	OUA	Difference	95% CI of diff.
Day 1	254.7	255.8	1.167	-6.988 to 9.321
Day 9	255.5	304.7	49.17	41.01 to 57.32
Day 18	255.5	365.8	110.3	102.2 to 118.5
Day 27	254.7	405.2	150.5	142.3 to 158.7
Treatment	Difference	t	P value	Summary
Day 1	1.167	0.513	P > 0.05	ns
Day 9	49.17	21.62	P<0.001	***
Day 18	110.3	48.51	P<0.001	***
Day 27	150.5	66.18	P<0.001	***
Sham control vs OUA + SNL40
Treatment	Sham control	OUA + SNL40	Difference	95% CI of diff.
Day 1	254.7	254.5	-0.1667	-8.321 to 7.988
Day 9	255.5	300.8	45.33	37.18 to 53.49
Day 18	255.5	348.2	92.67	84.51 to 100.8
Day 27	254.7	337.3	82.67	74.51 to 90.82
Treatment	Difference	t	P value	Summary
Day 1	-0.1667	0.07329	P > 0.05	ns
Day 9	45.33	19.93	P<0.001	***
Day 18	92.67	40.75	P<0.001	***
Day 27	82.67	36.35	P<0.001	***
Sham control vs OUA + SNL80
Treatment	Sham control	OUA + SNL80	Difference	95% CI of diff.
Day 1	254.7	254.2	-0.5	-8.654 to 7.654
Day 9	255.5	301.8	46.33	38.18 to 54.49
Day 18	255.5	344.3	88.83	80.68 to 96.99
Day 27	254.7	322.7	68	59.85 to 76.15
Treatment	Difference	t	P value	Summary
Day 1	-0.5	0.2199	P > 0.05	ns
Day 9	46.33	20.37	P<0.001	***
Day 18	88.83	39.06	P<0.001	***
Day 27	68	29.9	P<0.001	***
Sham control vs OUA + Li60
Treatment	Sham control	OUA + Li60	Difference	95% CI of diff.
Day 1	254.7	255.3	0.6667	-7.488 to 8.821
Day 9	255.5	300.8	45.33	37.18 to 53.49
Day 18	255.5	322.5	67	58.85 to 75.15
Day 27	254.7	308.5	53.83	45.68 to 61.99
Treatment	Difference	t	P value	Summary
Day 1	0.6667	0.2931	P > 0.05	ns
Day 9	45.33	19.93	P<0.001	***
Day 18	67	29.46	P<0.001	***
Day 27	53.83	23.67	P<0.001	***
Sham control vs OUA + SNL80 + Li60
Treatment	Sham control	OUA + SNL80 + Li60	Difference	95% CI of diff.
Day 1	254.7	256.3	1.667	-6.488 to 9.821
Day 9	255.5	300	44.5	36.35 to 52.65
Day 18	255.5	313.5	58	49.85 to 66.15
Day 27	254.7	292.5	37.83	29.68 to 45.99
Treatment	Difference	t	P value	Summary
Day 1	1.667	0.7328	P > 0.05	ns
Day 9	44.5	19.57	P<0.001	***
Day 18	58	25.5	P<0.001	***
Day 27	37.83	16.64	P<0.001	***
SNL80 perse vs OUA
Treatment	SNL80 perse	OUA	Difference	95% CI of diff.
Day 1	255.3	255.8	0.5	-7.654 to 8.654
Day 9	255.8	304.7	48.83	40.68 to 56.99
Day 18	254.7	365.8	111.2	103.0 to 119.3
Day 27	256.7	405.2	148.5	140.3 to 156.7
Treatment	Difference	t	P value	Summary
Day 1	0.5	0.2199	P > 0.05	ns
Day 9	48.83	21.47	P<0.001	***
Day 18	111.2	48.88	P<0.001	***
Day 27	148.5	65.3	P<0.001	***
SNL80 perse vs OUA + SNL40
Treatment	SNL80 perse	OUA + SNL40	Difference	95% CI of diff.
Day 1	255.3	254.5	-0.8333	-8.988 to 7.321
Day 9	255.8	300.8	45	36.85 to 53.15
Day 18	254.7	348.2	93.5	85.35 to 101.7
Day 27	256.7	337.3	80.67	72.51 to 88.82
Treatment	Difference	t	P value	Summary
Day 1	-0.8333	0.3664	P > 0.05	ns
Day 9	45	19.79	P<0.001	***
Day 18	93.5	41.11	P<0.001	***
Day 27	80.67	35.47	P<0.001	***
SNL80 perse vs OUA + SNL80
Treatment	SNL80 perse	OUA + SNL80	Difference	95% CI of diff.
Day 1	255.3	254.2	-1.167	-9.321 to 6.988
Day 9	255.8	301.8	46	37.85 to 54.15
Day 18	254.7	344.3	89.67	81.51 to 97.82
Day 27	256.7	322.7	66	57.85 to 74.15
Treatment	Difference	t	P value	Summary
Day 1	-1.167	0.513	P > 0.05	ns
Day 9	46	20.23	P<0.001	***
Day 18	89.67	39.43	P<0.001	***
Day 27	66	29.02	P<0.001	***
SNL80 perse vs OUA + Li60
Treatment	SNL80 perse	OUA + Li60	Difference	95% CI of diff.
Day 1	255.3	255.3	0	-8.154 to 8.154
Day 9	255.8	300.8	45	36.85 to 53.15
Day 18	254.7	322.5	67.83	59.68 to 75.99
Day 27	256.7	308.5	51.83	43.68 to 59.99
Treatment	Difference	t	P value	Summary
Day 1	0	0	P > 0.05	ns
Day 9	45	19.79	P<0.001	***
Day 18	67.83	29.83	P<0.001	***
Day 27	51.83	22.79	P<0.001	***
SNL80 perse vs OUA + SNL80 + Li60
Treatment	SNL80 perse	OUA + SNL80 + Li60	Difference	95% CI of diff.
Day 1	255.3	256.3	1	-7.154 to 9.154
Day 9	255.8	300	44.17	36.01 to 52.32
Day 18	254.7	313.5	58.83	50.68 to 66.99
Day 27	256.7	292.5	35.83	27.68 to 43.99
Treatment	Difference	t	P value	Summary
Day 1	1	0.4397	P > 0.05	ns
Day 9	44.17	19.42	P<0.001	***
Day 18	58.83	25.87	P<0.001	***
Day 27	35.83	15.76	P<0.001	***
OUA vs OUA + SNL40
Treatment	OUA	OUA + SNL40	Difference	95% CI of diff.
Day 1	255.8	254.5	-1.333	-9.488 to 6.821
Day 9	304.7	300.8	-3.833	-11.99 to 4.321
Day 18	365.8	348.2	-17.67	-25.82 to -9.512
Day 27	405.2	337.3	-67.83	-75.99 to -59.68
Treatment	Difference	t	P value	Summary
Day 1	-1.333	0.5863	P > 0.05	ns
Day 9	-3.833	1.686	P > 0.05	ns
Day 18	-17.67	7.768	P<0.001	***
Day 27	-67.83	29.83	P<0.001	***
OUA vs OUA + SNL80
Treatment	OUA	OUA + SNL80	Difference	95% CI of diff.
Day 1	255.8	254.2	-1.667	-9.821 to 6.488
Day 9	304.7	301.8	-2.833	-10.99 to 5.321
Day 18	365.8	344.3	-21.5	-29.65 to -13.35
Day 27	405.2	322.7	-82.5	-90.65 to -74.35
Treatment	Difference	t	P value	Summary
Day 1	-1.667	0.7328	P > 0.05	ns
Day 9	-2.833	1.246	P > 0.05	ns
Day 18	-21.5	9.454	P<0.001	***
Day 27	-82.5	36.28	P<0.001	***
OUA vs OUA + Li60
Treatment	OUA	OUA + Li60	Difference	95% CI of diff.
Day 1	255.8	255.3	-0.5	-8.654 to 7.654
Day 9	304.7	300.8	-3.833	-11.99 to 4.321
Day 18	365.8	322.5	-43.33	-51.49 to -35.18
Day 27	405.2	308.5	-96.67	-104.8 to -88.51
Treatment	Difference	t	P value	Summary
Day 1	-0.5	0.2199	P > 0.05	ns
Day 9	-3.833	1.686	P > 0.05	ns
Day 18	-43.33	19.05	P<0.001	***
Day 27	-96.67	42.5	P<0.001	***
OUA vs OUA + SNL80 + Li60
Treatment	OUA	OUA + SNL80 + Li60	Difference	95% CI of diff.
Day 1	255.8	256.3	0.5	-7.654 to 8.654
Day 9	304.7	300	-4.667	-12.82 to 3.488
Day 18	365.8	313.5	-52.33	-60.49 to -44.18
Day 27	405.2	292.5	-112.7	-120.8 to -104.5
Treatment	Difference	t	P value	Summary
Day 1	0.5	0.2199	P > 0.05	ns
Day 9	-4.667	2.052	P > 0.05	ns
Day 18	-52.33	23.01	P<0.001	***
Day 27	-112.7	49.54	P<0.001	***
OUA + SNL40 vs OUA + SNL80
Treatment	OUA + SNL40	OUA + SNL80	Difference	95% CI of diff.
Day 1	254.5	254.2	-0.3333	-8.488 to 7.821
Day 9	300.8	301.8	1	-7.154 to 9.154
Day 18	348.2	344.3	-3.833	-11.99 to 4.321
Day 27	337.3	322.7	-14.67	-22.82 to -6.512
Treatment	Difference	t	P value	Summary
Day 1	-0.3333	0.1466	P > 0.05	ns
Day 9	1	0.4397	P > 0.05	ns
Day 18	-3.833	1.686	P > 0.05	ns
Day 27	-14.67	6.449	P<0.001	***
OUA + SNL40 vs OUA + Li60
Treatment	OUA + SNL40	OUA + Li60	Difference	95% CI of diff.
Day 1	254.5	255.3	0.8333	-7.321 to 8.988
Day 9	300.8	300.8	0	-8.154 to 8.154
Day 18	348.2	322.5	-25.67	-33.82 to -17.51
Day 27	337.3	308.5	-28.83	-36.99 to -20.68
Treatment	Difference	t	P value	Summary
Day 1	0.8333	0.3664	P > 0.05	ns
Day 9	0	0	P > 0.05	ns
Day 18	-25.67	11.29	P<0.001	***
Day 27	-28.83	12.68	P<0.001	***
OUA + SNL40 vs OUA + SNL80 + Li60
Treatment	OUA + SNL40	OUA + SNL80 + Li60	Difference	95% CI of diff.
Day 1	254.5	256.3	1.833	-6.321 to 9.988
Day 9	300.8	300	-0.8333	-8.988 to 7.321
Day 18	348.2	313.5	-34.67	-42.82 to -26.51
Day 27	337.3	292.5	-44.83	-52.99 to -36.68
Treatment	Difference	t	P value	Summary
Day 1	1.833	0.8061	P > 0.05	ns
Day 9	-0.8333	0.3664	P > 0.05	ns
Day 18	-34.67	15.24	P<0.001	***
Day 27	-44.83	19.71	P<0.001	***
OUA + SNL80 vs OUA + Li60
Treatment	OUA + SNL80	OUA + Li60	Difference	95% CI of diff.
Day 1	254.2	255.3	1.167	-6.988 to 9.321
Day 9	301.8	300.8	-1	-9.154 to 7.154
Day 18	344.3	322.5	-21.83	-29.99 to -13.68
Day 27	322.7	308.5	-14.17	-22.32 to -6.012
Treatment	Difference	t	P value	Summary
Day 1	1.167	0.513	P > 0.05	ns
Day 9	-1	0.4397	P > 0.05	ns
Day 18	-21.83	9.6	P<0.001	***
Day 27	-14.17	6.229	P<0.001	***
OUA + SNL80 vs OUA + SNL80 + Li60
Treatment	OUA + SNL80	OUA + SNL80 + Li60	Difference	95% CI of diff.
Day 1	254.2	256.3	2.167	-5.988 to 10.32
Day 9	301.8	300	-1.833	-9.988 to 6.321
Day 18	344.3	313.5	-30.83	-38.99 to -22.68
Day 27	322.7	292.5	-30.17	-38.32 to -22.01
Treatment	Difference	t	P value	Summary
Day 1	2.167	0.9527	P > 0.05	ns
Day 9	-1.833	0.8061	P > 0.05	ns
Day 18	-30.83	13.56	P<0.001	***
Day 27	-30.17	13.26	P<0.001	***
OUA + Li60 vs OUA + SNL80 + Li60
Treatment	OUA + Li60	OUA + SNL80 + Li60	Difference	95% CI of diff.
Day 1	255.3	256.3	1	-7.154 to 9.154
Day 9	300.8	300	-0.8333	-8.988 to 7.321
Day 18	322.5	313.5	-9	-17.15 to -0.8457
Day 27	308.5	292.5	-16	-24.15 to -7.846
Treatment	Difference	t	P value	Summary
Day 1	1	0.4397	P > 0.05	ns
Day 9	-0.8333	0.3664	P > 0.05	ns
Day 18	-9	3.957	P<0.001	***
Day 27	-16	7.035	P<0.001	***
Source of Variation	DF	Sum of Squares	Mean Square
Interaction	21	79700	3795
Time	3	83470	27820
Treatment	7	146200	20890
Subjects (matching)	40	724.8	18.12
Residual (Error)	120	1758	14.65
Total	191	311900
Does Time have the same effect at all values of Treatment?
Interaction accounts for 25.55% of the total variance.
F = 259.08. DFn=21 DFd=120
The P value is <0.0001
If there is no interaction overall, there is a less than 0.01% chance of randomly observing so much
interaction in an experiment of this size. The interaction is considered extremely significant.
Since the interaction is statistically significant, the P values that
follow for the row and column effects are difficult to interpret.
Does Treatment affect the result? (Are the curves different?)
Treatment accounts for 46.89% of the total variance (after adjusting for matching).
F = 1152.94. DFn=7 DFd=120
The P value is <0.0001
If Treatment has no effect overall, there is a less than 0.01chance of randomly observing an
effect this big (or bigger) in an experiment of this size. The effect is considered extremely significant.
Does Time affect the result? (Are the curves horizontal?)
Time accounts for 26.76% of the total variance (after adjusting for matching).
F = 1899.41. DFn=3 DFd=120
The P value is <0.0001
If Time has no effect overall, there is a less than 0.01chance of randomly observing an
effect this big (or bigger) in an experiment of this size. The effect is considered extremely significant.
Was the matching effective?
F = 1.24. DFn=40 DFd=120
The P value = 0.1899
If matching were not effective overall, there is a 19% chance of randomly observing an
effect this big (or bigger) in an experiment of this size. The effect is considered not significant.
