# Supplementary material for: Solanesol Mediated SIRT-1 Signaling Activation Prevents Neurobehavioral and Neurochemical Defects in Ouabain-induced Experimental Model of Bipolar Disorder in Rats
Source: Research Square preprint supplement (doi:10.21203/rs.3.rs-735926/v1), 2021-08-02
Supplement: Supplementary file 2 [file a1a9bd2c3c7ddf6bc1c0862b.xlsx]

## Sheet: BAX
Vehicle control	Sham control	SNL80 perse	OUA	OUA + SNL40	OUA + SNL80	OUA + Li60	OUA + SNL80 + Li60
0.7	1.08	0.93	4.7	3.89	3.35	2.65	1.75
0.79	1.01	0.72	4.35	3.92	3.75	2.25	1.5
0.85	0.72	0.84	4.52	4.06	3.46	2.34	1.69
0.92	0.86	1.1	4.67	4.12	3.61	2.46	1.53
1.04	0.97	1.03	4.75	4.22	3.59	2.33	1.64
1.1	0.76	0.76	4.49	4.25	3.4	2.26	1.55
	Vehicle control	Sham control	SNL80 perse	OUA	OUA + SNL40	OUA + SNL80	OUA + Li60	OUA + SNL80 + Li60
Number of values	6	6	6	6	6	6	6	6
Minimum	0.7	0.72	0.72	4.35	3.89	3.35	2.25	1.5
25% Percentile	0.7675	0.75	0.75	4.455	3.913	3.388	2.258	1.523
Median	0.885	0.915	0.885	4.595	4.09	3.525	2.335	1.595
75% Percentile	1.055	1.028	1.048	4.713	4.228	3.645	2.508	1.705
Maximum	1.1	1.08	1.1	4.75	4.25	3.75	2.65	1.75
Mean	0.9	0.9	0.8967	4.58	4.077	3.527	2.382	1.61
Std. Deviation	0.1514	0.1435	0.1506	0.1523	0.1498	0.15	0.1514	0.09899
Std. Error	0.06181	0.05859	0.06146	0.06218	0.06114	0.06125	0.06183	0.04041
Lower 95% CI of mean	0.7411	0.7494	0.7387	4.42	3.92	3.369	2.223	1.506
Upper 95% CI of mean	1.059	1.051	1.055	4.74	4.234	3.684	2.541	1.714
KS normality test
KS distance	0.1558	0.1871	0.1513	0.2227	0.1856	0.1716	0.275	0.2278
P value	> 0.10	> 0.10	> 0.10	> 0.10	> 0.10	> 0.10	> 0.10	> 0.10
Passed normality test (alpha=0.05)?	Yes	Yes	Yes	Yes	Yes	Yes	Yes	Yes
P value summary	ns	ns	ns	ns	ns	ns	ns	ns
Sum	5.4	5.4	5.38	27.48	24.46	21.16	14.29	9.66
Parameter
Table Analyzed	Data 1
Repeated Measures ANOVA
P value	< 0.0001
P value summary	***
Are means signif. different? (P < 0.05)	Yes
Number of groups	8
F	717.3
R squared	0.9931
Was the pairing significantly effective?
R squared	0.001607
F	1.628
P value	0.1783
P value summary	ns
Is there significant matching? (P < 0.05)	No
ANOVA Table	SS	df	MS
Treatment (between columns)	97.22	7	13.89
Individual (between rows)	0.1576	5	0.03152
Residual (random)	0.6777	35	0.01936
Total	98.06	47
Tukey's Multiple Comparison Test	Mean Diff.	q	Significant? P < 0.05?	Summary	95% CI of diff
Vehicle control vs Sham control	-5.961e-08	1.049e-06	No	ns	-0.2591 to 0.2591
Vehicle control vs SNL80 perse	0.003333	0.05868	No	ns	-0.2558 to 0.2625
Vehicle control vs OUB	-3.68	64.78	Yes	***	-3.939 to -3.421
Vehicle control vs OUB + SNL40	-3.177	55.92	Yes	***	-3.436 to -2.918
Vehicle control vs OUB + SNL80	-2.627	46.24	Yes	***	-2.886 to -2.368
Vehicle control vs OUB + Li60	-1.482	26.08	Yes	***	-1.741 to -1.223
Vehicle control vs OUB + SNL80 + Li60	-0.71	12.5	Yes	***	-0.9691 to -0.4509
Sham control vs SNL80 perse	0.003333	0.05868	No	ns	-0.2558 to 0.2625
Sham control vs OUB	-3.68	64.78	Yes	***	-3.939 to -3.421
Sham control vs OUB + SNL40	-3.177	55.92	Yes	***	-3.436 to -2.918
Sham control vs OUB + SNL80	-2.627	46.24	Yes	***	-2.886 to -2.368
Sham control vs OUB + Li60	-1.482	26.08	Yes	***	-1.741 to -1.223
Sham control vs OUB + SNL80 + Li60	-0.71	12.5	Yes	***	-0.9691 to -0.4509
SNL80 perse vs OUB	-3.683	64.84	Yes	***	-3.942 to -3.424
SNL80 perse vs OUB + SNL40	-3.18	55.98	Yes	***	-3.439 to -2.921
SNL80 perse vs OUB + SNL80	-2.63	46.3	Yes	***	-2.889 to -2.371
SNL80 perse vs OUB + Li60	-1.485	26.14	Yes	***	-1.744 to -1.226
SNL80 perse vs OUB + SNL80 + Li60	-0.7133	12.56	Yes	***	-0.9725 to -0.4542
OUB vs OUB + SNL40	0.5033	8.86	Yes	***	0.2442 to 0.7625
OUB vs OUB + SNL80	1.053	18.54	Yes	***	0.7942 to 1.312
OUB vs OUB + Li60	2.198	38.7	Yes	***	1.939 to 2.457
OUB vs OUB + SNL80 + Li60	2.97	52.28	Yes	***	2.711 to 3.229
OUB + SNL40 vs OUB + SNL80	0.55	9.682	Yes	***	0.2909 to 0.8091
OUB + SNL40 vs OUB + Li60	1.695	29.84	Yes	***	1.436 to 1.954
OUB + SNL40 vs OUB + SNL80 + Li60	2.467	43.42	Yes	***	2.208 to 2.726
OUB + SNL80 vs OUB + Li60	1.145	20.16	Yes	***	0.8859 to 1.404
OUB + SNL80 vs OUB + SNL80 + Li60	1.917	33.74	Yes	***	1.658 to 2.176
OUB + Li60 vs OUB + SNL80 + Li60	0.7717	13.58	Yes	***	0.5125 to 1.031

## Sheet: Bcl2
Vehicle control	Sham control	SNL80 perse	OUA	OUA + SNL40	OUA + SNL80	OUA + Li60	OUA + SNL80 + Li60
6.3	6.62	6.46	1.5	2.6	3.4	4.3	5.33
6.34	6.3	6.57	1.75	2.64	3.9	4.8	5.23
6.48	6.45	6.42	1.56	2.75	3.45	4.52	5.5
6.6	6.34	6.66	1.64	2.85	3.57	4.44	5.4
6.55	6.67	6.35	1.98	2.91	3.64	4.63	5.3
6.37	6.7	6.49	1.81	3	3.76	4.75	5.2
	Vehicle control	Sham control	SNL80 perse	OUA	OUA + SNL40	OUA + SNL80	OUA + Li60	OUA + SNL80 + Li60
Number of values	6	6	6	6	6	6	6	6
Minimum	6.3	6.3	6.35	1.5	2.6	3.4	4.3	5.2
25% Percentile	6.33	6.33	6.403	1.545	2.63	3.438	4.405	5.223
Median	6.425	6.535	6.475	1.695	2.8	3.605	4.575	5.315
75% Percentile	6.563	6.678	6.593	1.853	2.933	3.795	4.763	5.425
Maximum	6.6	6.7	6.66	1.98	3	3.9	4.8	5.5
Mean	6.44	6.513	6.492	1.707	2.792	3.62	4.573	5.327
Std. Deviation	0.1215	0.1734	0.1102	0.1766	0.1564	0.1888	0.1903	0.1109
Std. Error	0.0496	0.07079	0.04498	0.0721	0.06384	0.07707	0.0777	0.04529
Lower 95% CI of mean	6.313	6.331	6.376	1.521	2.628	3.422	4.374	5.21
Upper 95% CI of mean	6.567	6.695	6.607	1.892	2.956	3.818	4.773	5.443
KS normality test
KS distance	0.2177	0.2308	0.1727	0.1471	0.1672	0.1494	0.1567	0.1547
P value	> 0.10	> 0.10	> 0.10	> 0.10	> 0.10	> 0.10	> 0.10	> 0.10
Passed normality test (alpha=0.05)?	Yes	Yes	Yes	Yes	Yes	Yes	Yes	Yes
P value summary	ns	ns	ns	ns	ns	ns	ns	ns
Sum	38.64	39.08	38.95	10.24	16.75	21.72	27.44	31.96
Parameter
Table Analyzed	Data 1
Repeated Measures ANOVA
P value	< 0.0001
P value summary	***
Are means signif. different? (P < 0.05)	Yes
Number of groups	8
F	925.8
R squared	0.9946
Was the pairing significantly effective?
R squared	0.001508
F	1.968
P value	0.1079
P value summary	ns
Is there significant matching? (P < 0.05)	No
ANOVA Table	SS	df	MS
Treatment (between columns)	142.2	7	20.31
Individual (between rows)	0.2159	5	0.04318
Residual (random)	0.768	35	0.02194
Total	143.2	47
Tukey's Multiple Comparison Test	Mean Diff.	q	Significant? P < 0.05?	Summary	95% CI of diff
Vehicle control vs Sham control	-0.07333	1.213	No	ns	-0.3492 to 0.2025
Vehicle control vs SNL80 perse	-0.05167	0.8544	No	ns	-0.3275 to 0.2242
Vehicle control vs OUA	4.733	78.27	Yes	***	4.457 to 5.009
Vehicle control vs OUA + SNL40	3.648	60.33	Yes	***	3.372 to 3.924
Vehicle control vs OUA + SNL80	2.82	46.63	Yes	***	2.544 to 3.096
Vehicle control vs OUA + Li60	1.867	30.87	Yes	***	1.591 to 2.143
Vehicle control vs OUA + SNL80 + Li60	1.113	18.41	Yes	***	0.8375 to 1.389
Sham control vs SNL80 perse	0.02167	0.3583	No	ns	-0.2542 to 0.2975
Sham control vs OUA	4.807	79.48	Yes	***	4.531 to 5.083
Sham control vs OUA + SNL40	3.722	61.54	Yes	***	3.446 to 3.998
Sham control vs OUA + SNL80	2.893	47.84	Yes	***	2.617 to 3.169
Sham control vs OUA + Li60	1.94	32.08	Yes	***	1.664 to 2.216
Sham control vs OUA + SNL80 + Li60	1.187	19.62	Yes	***	0.9108 to 1.463
SNL80 perse vs OUA	4.785	79.12	Yes	***	4.509 to 5.061
SNL80 perse vs OUA + SNL40	3.7	61.18	Yes	***	3.424 to 3.976
SNL80 perse vs OUA + SNL80	2.872	47.49	Yes	***	2.596 to 3.148
SNL80 perse vs OUA + Li60	1.918	31.72	Yes	***	1.642 to 2.194
SNL80 perse vs OUA + SNL80 + Li60	1.165	19.26	Yes	***	0.8891 to 1.441
OUA vs OUA + SNL40	-1.085	17.94	Yes	***	-1.361 to -0.8091
OUA vs OUA + SNL80	-1.913	31.64	Yes	***	-2.189 to -1.637
OUA vs OUA + Li60	-2.867	47.4	Yes	***	-3.143 to -2.591
OUA vs OUA + SNL80 + Li60	-3.62	59.86	Yes	***	-3.896 to -3.344
OUA + SNL40 vs OUA + SNL80	-0.8283	13.7	Yes	***	-1.104 to -0.5525
OUA + SNL40 vs OUA + Li60	-1.782	29.46	Yes	***	-2.058 to -1.506
OUA + SNL40 vs OUA + SNL80 + Li60	-2.535	41.92	Yes	***	-2.811 to -2.259
OUA + SNL80 vs OUA + Li60	-0.9533	15.76	Yes	***	-1.229 to -0.6775
OUA + SNL80 vs OUA + SNL80 + Li60	-1.707	28.22	Yes	***	-1.983 to -1.431
OUA + Li60 vs OUA + SNL80 + Li60	-0.7533	12.46	Yes	***	-1.029 to -0.4775

## Sheet: Caspase3
Vehicle control	Sham control	SNL80 perse	OUA	OUA + SNL40	OUA + SNL80	OUA + Li60	OUA + SNL80 + Li60
1.61	1.63	1.76	4.8	3.5	3.45	2.62	2.08
1.78	1.67	1.72	4.56	3.56	3.05	2.57	2.5
1.7	1.76	1.6	5	3.66	3.33	2.84	2.36
1.65	1.72	1.65	4.99	3.72	3.26	2.77	2.18
1.75	1.64	1.78	4.64	3.87	3.17	2.93	2.22
1.77	1.69	1.64	4.77	3.99	3.48	3	2.41
	Vehicle control	Sham control	SNL80 perse	OUB	OUB + SNL40	OUB + SNL80	OUB + Li60	OUB + SNL80 + Li60
Number of values	6	6	6	6	6	6	6	6
Minimum	1.61	1.63	1.6	4.56	3.5	3.05	2.57	2.08
25% Percentile	1.64	1.638	1.63	4.62	3.545	3.14	2.608	2.155
Median	1.725	1.68	1.685	4.785	3.69	3.295	2.805	2.29
75% Percentile	1.773	1.73	1.765	4.993	3.9	3.458	2.948	2.433
Maximum	1.78	1.76	1.78	5	3.99	3.48	3	2.5
Mean	1.71	1.685	1.692	4.793	3.717	3.29	2.788	2.292
Std. Deviation	0.06899	0.0493	0.07223	0.1788	0.186	0.165	0.1696	0.1578
Std. Error	0.02817	0.02012	0.02949	0.07301	0.07592	0.06738	0.06925	0.06442
Lower 95% CI of mean	1.638	1.633	1.616	4.606	3.521	3.117	2.61	2.126
Upper 95% CI of mean	1.782	1.737	1.767	4.981	3.912	3.463	2.966	2.457
KS normality test
KS distance	0.219	0.1527	0.218	0.1976	0.1595	0.1671	0.1728	0.1751
P value	> 0.10	> 0.10	> 0.10	> 0.10	> 0.10	> 0.10	> 0.10	> 0.10
Passed normality test (alpha=0.05)?	Yes	Yes	Yes	Yes	Yes	Yes	Yes	Yes
P value summary	ns	ns	ns	ns	ns	ns	ns	ns
Sum	10.26	10.11	10.15	28.76	22.3	19.74	16.73	13.75
Parameter
Table Analyzed	Data 1
Repeated Measures ANOVA
P value	< 0.0001
P value summary	***
Are means signif. different? (P < 0.05)	Yes
Number of groups	8
F	419.2
R squared	0.9882
Was the pairing significantly effective?
R squared	0.002919
F	1.739
P value	0.1516
P value summary	ns
Is there significant matching? (P < 0.05)	No
ANOVA Table	SS	df	MS
Treatment (between columns)	53.69	7	7.67
Individual (between rows)	0.1591	5	0.03181
Residual (random)	0.6404	35	0.0183
Total	54.49	47
Tukey's Multiple Comparison Test	Mean Diff.	q	Significant? P < 0.05?	Summary	95% CI of diff
Vehicle control vs Sham control	0.025	0.4527	No	ns	-0.2269 to 0.2769
Vehicle control vs SNL80 perse	0.01833	0.332	No	ns	-0.2336 to 0.2702
Vehicle control vs OUB	-3.083	55.83	Yes	***	-3.335 to -2.831
Vehicle control vs OUB + SNL40	-2.007	36.34	Yes	***	-2.259 to -1.755
Vehicle control vs OUB + SNL80	-1.58	28.61	Yes	***	-1.832 to -1.328
Vehicle control vs OUB + Li60	-1.078	19.53	Yes	***	-1.330 to -0.8264
Vehicle control vs OUB + SNL80 + Li60	-0.5817	10.53	Yes	***	-0.8336 to -0.3298
Sham control vs SNL80 perse	-0.006667	0.1207	No	ns	-0.2586 to 0.2452
Sham control vs OUB	-3.108	56.29	Yes	***	-3.360 to -2.856
Sham control vs OUB + SNL40	-2.032	36.79	Yes	***	-2.284 to -1.780
Sham control vs OUB + SNL80	-1.605	29.06	Yes	***	-1.857 to -1.353
Sham control vs OUB + Li60	-1.103	19.98	Yes	***	-1.355 to -0.8514
Sham control vs OUB + SNL80 + Li60	-0.6067	10.99	Yes	***	-0.8586 to -0.3548
SNL80 perse vs OUB	-3.102	56.17	Yes	***	-3.354 to -2.850
SNL80 perse vs OUB + SNL40	-2.025	36.67	Yes	***	-2.277 to -1.773
SNL80 perse vs OUB + SNL80	-1.598	28.94	Yes	***	-1.850 to -1.346
SNL80 perse vs OUB + Li60	-1.097	19.86	Yes	***	-1.349 to -0.8448
SNL80 perse vs OUB + SNL80 + Li60	-0.6	10.87	Yes	***	-0.8519 to -0.3481
OUB vs OUB + SNL40	1.077	19.5	Yes	***	0.8248 to 1.329
OUB vs OUB + SNL80	1.503	27.22	Yes	***	1.251 to 1.755
OUB vs OUB + Li60	2.005	36.31	Yes	***	1.753 to 2.257
OUB vs OUB + SNL80 + Li60	2.502	45.3	Yes	***	2.250 to 2.754
OUB + SNL40 vs OUB + SNL80	0.4267	7.726	Yes	***	0.1748 to 0.6786
OUB + SNL40 vs OUB + Li60	0.9283	16.81	Yes	***	0.6764 to 1.180
OUB + SNL40 vs OUB + SNL80 + Li60	1.425	25.8	Yes	***	1.173 to 1.677
OUB + SNL80 vs OUB + Li60	0.5017	9.084	Yes	***	0.2498 to 0.7536
OUB + SNL80 vs OUB + SNL80 + Li60	0.9983	18.08	Yes	***	0.7464 to 1.250
OUB + Li60 vs OUB + SNL80 + Li60	0.4967	8.994	Yes	***	0.2448 to 0.7486

## Sheet: TNF-a
Vehicle control	Sham control	SNL80 perse	OUA	OUA + SNL40	OUA + SNL80	OUA + Li60	OUA + SNL80 + Li60
20.2	20.52	19.97	94.3	76.4	58.68	42.3	27.1
19.98	19.99	21.3	92.22	72.6	56	45.5	26.64
21.23	21.67	20.59	97.62	75.32	57.62	43.53	28.32
22.01	22	22.01	100.63	69.25	55.34	42.67	27.87
19.99	20.97	21.62	93.49	70.94	57.9	44.35	29.76
20.63	20.46	20.34	99.02	72.02	59.53	44.69	26.5
	Vehicle control	Sham control	SNL80 perse	OUA	OUA + SNL40	OUA + SNL80	OUA + Li60	OUA + SNL80 + Li60
Number of values	6	6	6	6	6	6	6	6
Minimum	19.98	19.99	19.97	92.22	69.25	55.34	42.3	26.5
25% Percentile	19.99	20.34	20.25	93.17	70.52	55.84	42.58	26.61
Median	20.42	20.75	20.95	95.96	72.31	57.76	43.94	27.49
75% Percentile	21.43	21.75	21.72	99.42	75.59	58.89	44.89	28.68
Maximum	22.01	22	22.01	100.6	76.4	59.53	45.5	29.76
Mean	20.67	20.94	20.97	96.21	72.76	57.51	43.84	27.7
Std. Deviation	0.8087	0.7703	0.7943	3.358	2.684	1.588	1.231	1.231
Std. Error	0.3302	0.3145	0.3243	1.371	1.096	0.6481	0.5025	0.5027
Lower 95% CI of mean	19.82	20.13	20.14	92.69	69.94	55.85	42.55	26.41
Upper 95% CI of mean	21.52	21.74	21.81	99.74	75.57	59.18	45.13	28.99
KS normality test
KS distance	0.2208	0.205	0.1846	0.2156	0.1897	0.1939	0.1624	0.1865
P value	> 0.10	> 0.10	> 0.10	> 0.10	> 0.10	> 0.10	> 0.10	> 0.10
Passed normality test (alpha=0.05)?	Yes	Yes	Yes	Yes	Yes	Yes	Yes	Yes
P value summary	ns	ns	ns	ns	ns	ns	ns	ns
Sum	124	125.6	125.8	577.3	436.5	345.1	263	166.2
Parameter
Table Analyzed	Data 1
Repeated Measures ANOVA
P value	< 0.0001
P value summary	***
Are means signif. different? (P < 0.05)	Yes
Number of groups	8
F	1406
R squared	0.9965
Was the pairing significantly effective?
R squared	0.0002986
F	0.5898
P value	0.7077
P value summary	ns
Is there significant matching? (P < 0.05)	No
ANOVA Table	SS	df	MS
Treatment (between columns)	33590	7	4799
Individual (between rows)	10.07	5	2.014
Residual (random)	119.5	35	3.414
Total	33720	47
Tukey's Multiple Comparison Test	Mean Diff.	q	Significant? P < 0.05?	Summary	95% CI of diff
Vehicle control vs Sham control	-0.2617	0.3469	No	ns	-3.702 to 3.179
Vehicle control vs SNL80 perse	-0.2983	0.3955	No	ns	-3.739 to 3.142
Vehicle control vs OUA	-75.54	100.1	Yes	***	-78.98 to -72.10
Vehicle control vs OUA + SNL40	-52.08	69.05	Yes	***	-55.52 to -48.64
Vehicle control vs OUA + SNL80	-36.84	48.84	Yes	***	-40.28 to -33.40
Vehicle control vs OUA + Li60	-23.17	30.71	Yes	***	-26.61 to -19.73
Vehicle control vs OUA + SNL80 + Li60	-7.025	9.313	Yes	***	-10.47 to -3.584
Sham control vs SNL80 perse	-0.03667	0.04861	No	ns	-3.477 to 3.404
Sham control vs OUA	-75.28	99.8	Yes	***	-78.72 to -71.84
Sham control vs OUA + SNL40	-51.82	68.7	Yes	***	-55.26 to -48.38
Sham control vs OUA + SNL80	-36.58	48.49	Yes	***	-40.02 to -33.14
Sham control vs OUA + Li60	-22.91	30.37	Yes	***	-26.35 to -19.46
Sham control vs OUA + SNL80 + Li60	-6.763	8.967	Yes	***	-10.20 to -3.323
SNL80 perse vs OUA	-75.24	99.75	Yes	***	-78.68 to -71.80
SNL80 perse vs OUA + SNL40	-51.78	68.65	Yes	***	-55.22 to -48.34
SNL80 perse vs OUA + SNL80	-36.54	48.44	Yes	***	-39.98 to -33.10
SNL80 perse vs OUA + Li60	-22.87	30.32	Yes	***	-26.31 to -19.43
SNL80 perse vs OUA + SNL80 + Li60	-6.727	8.918	Yes	***	-10.17 to -3.286
OUA vs OUA + SNL40	23.46	31.1	Yes	***	20.02 to 26.90
OUA vs OUA + SNL80	38.7	51.31	Yes	***	35.26 to 42.14
OUA vs OUA + Li60	52.37	69.43	Yes	***	48.93 to 55.81
OUA vs OUA + SNL80 + Li60	68.52	90.83	Yes	***	65.07 to 71.96
OUA + SNL40 vs OUA + SNL80	15.24	20.21	Yes	***	11.80 to 18.68
OUA + SNL40 vs OUA + Li60	28.92	38.33	Yes	***	25.47 to 32.36
OUA + SNL40 vs OUA + SNL80 + Li60	45.06	59.73	Yes	***	41.62 to 48.50
OUA + SNL80 vs OUA + Li60	13.67	18.13	Yes	***	10.23 to 17.11
OUA + SNL80 vs OUA + SNL80 + Li60	29.81	39.53	Yes	***	26.37 to 33.25
OUA + Li60 vs OUA + SNL80 + Li60	16.14	21.4	Yes	***	12.70 to 19.58

## Sheet: IL-B
Vehicle control	Sham control	SNL80 perse	OUA	OUA + SNL40	OUA + SNL80	OUA + Li60	OUA + SNL80 + Li60
13.78	14.33	15.05	77.5	57.75	40.23	26.95	18.29
15.2	13.91	15.18	75.23	55.87	42.35	25.61	20.21
13.98	13.84	13.86	78.47	58.23	44.46	28.29	19.25
14.86	15.08	14.29	76.86	56.41	43.52	25.33	18.56
14.71	14.22	13.83	77.67	59.16	41.56	26.84	19.47
13.82	13.53	14.76	79.2	55.32	41.89	27.42	20.02
	Vehicle control	Sham control	SNL80 perse	OUB	OUB + SNL40	OUB + SNL80	OUB + Li60	OUB + SNL80 + Li60
Number of values	6	6	6	6	6	6	6	6
Minimum	13.78	13.53	13.83	75.23	55.32	40.23	25.33	18.29
25% Percentile	13.81	13.76	13.85	76.45	55.73	41.23	25.54	18.49
Median	14.35	14.07	14.53	77.59	57.08	42.12	26.9	19.36
75% Percentile	14.95	14.52	15.08	78.65	58.46	43.76	27.64	20.07
Maximum	15.2	15.08	15.18	79.2	59.16	44.46	28.29	20.21
Mean	14.39	14.15	14.5	77.49	57.12	42.34	26.74	19.3
Std. Deviation	0.6074	0.5367	0.5891	1.373	1.49	1.493	1.112	0.7675
Std. Error	0.248	0.2191	0.2405	0.5604	0.6082	0.6096	0.454	0.3133
Lower 95% CI of mean	13.75	13.59	13.88	76.05	55.56	40.77	25.57	18.49
Upper 95% CI of mean	15.03	14.71	15.11	78.93	58.69	43.9	27.91	20.11
KS normality test
KS distance	0.251	0.2032	0.1928	0.1701	0.184	0.1627	0.2025	0.1658
P value	> 0.10	> 0.10	> 0.10	> 0.10	> 0.10	> 0.10	> 0.10	> 0.10
Passed normality test (alpha=0.05)?	Yes	Yes	Yes	Yes	Yes	Yes	Yes	Yes
P value summary	ns	ns	ns	ns	ns	ns	ns	ns
Sum	86.35	84.91	86.97	464.9	342.7	254	160.4	115.8
Parameter
Table Analyzed	Data 1
Repeated Measures ANOVA
P value	< 0.0001
P value summary	***
Are means signif. different? (P < 0.05)	Yes
Number of groups	8
F	2819
R squared	0.9982
Was the pairing significantly effective?
R squared	0.0001748
F	0.6914
P value	0.6333
P value summary	ns
Is there significant matching? (P < 0.05)	No
ANOVA Table	SS	df	MS
Treatment (between columns)	23510	7	3359
Individual (between rows)	4.119	5	0.8237
Residual (random)	41.7	35	1.191
Total	23560	47
Tukey's Multiple Comparison Test	Mean Diff.	q	Significant? P < 0.05?	Summary	95% CI of diff
Vehicle control vs Sham control	0.24	0.5386	No	ns	-1.793 to 2.273
Vehicle control vs SNL80 perse	-0.1033	0.2319	No	ns	-2.136 to 1.929
Vehicle control vs OUB	-63.1	141.6	Yes	***	-65.13 to -61.06
Vehicle control vs OUB + SNL40	-42.73	95.9	Yes	***	-44.76 to -40.70
Vehicle control vs OUB + SNL80	-27.94	62.71	Yes	***	-29.98 to -25.91
Vehicle control vs OUB + Li60	-12.35	27.71	Yes	***	-14.38 to -10.32
Vehicle control vs OUB + SNL80 + Li60	-4.908	11.02	Yes	***	-6.941 to -2.876
Sham control vs SNL80 perse	-0.3433	0.7705	No	ns	-2.376 to 1.689
Sham control vs OUB	-63.34	142.1	Yes	***	-65.37 to -61.30
Sham control vs OUB + SNL40	-42.97	96.43	Yes	***	-45.00 to -40.94
Sham control vs OUB + SNL80	-28.18	63.25	Yes	***	-30.22 to -26.15
Sham control vs OUB + Li60	-12.59	28.25	Yes	***	-14.62 to -10.56
Sham control vs OUB + SNL80 + Li60	-5.148	11.55	Yes	***	-7.181 to -3.116
SNL80 perse vs OUB	-62.99	141.4	Yes	***	-65.03 to -60.96
SNL80 perse vs OUB + SNL40	-42.63	95.66	Yes	***	-44.66 to -40.60
SNL80 perse vs OUB + SNL80	-27.84	62.48	Yes	***	-29.87 to -25.81
SNL80 perse vs OUB + Li60	-12.25	27.48	Yes	***	-14.28 to -10.21
SNL80 perse vs OUB + SNL80 + Li60	-4.805	10.78	Yes	***	-6.838 to -2.772
OUB vs OUB + SNL40	20.37	45.7	Yes	***	18.33 to 22.40
OUB vs OUB + SNL80	35.15	78.89	Yes	***	33.12 to 37.19
OUB vs OUB + Li60	50.75	113.9	Yes	***	48.72 to 52.78
OUB vs OUB + SNL80 + Li60	58.19	130.6	Yes	***	56.16 to 60.22
OUB + SNL40 vs OUB + SNL80	14.79	33.19	Yes	***	12.76 to 16.82
OUB + SNL40 vs OUB + Li60	30.38	68.18	Yes	***	28.35 to 32.42
OUB + SNL40 vs OUB + SNL80 + Li60	37.82	84.88	Yes	***	35.79 to 39.86
OUB + SNL80 vs OUB + Li60	15.6	35	Yes	***	13.56 to 17.63
OUB + SNL80 vs OUB + SNL80 + Li60	23.04	51.69	Yes	***	21.00 to 25.07
OUB + Li60 vs OUB + SNL80 + Li60	7.44	16.7	Yes	***	5.407 to 9.473
