# Supplementary material for: Solanesol Mediated SIRT-1 Signaling Activation Prevents Neurobehavioral and Neurochemical Defects in Ouabain-induced Experimental Model of Bipolar Disorder in Rats
Source: Research Square preprint supplement (doi:10.21203/rs.3.rs-735926/v1), 2021-08-02
Supplement: Supplementary file 3 [file f1ef824833e2ef95ffd26f7b.xlsx]

## Sheet: C-IV
Vehicle control	Sham control	SNL80 perse	OUA	OUA + SNL40	OUA + SNL80	OUA + Li60	OUA + SNL80 + Li60
205.13	206.47	207.87	115.42	125.42	145	167.53	186.74
212.56	208.94	205.6	116.21	127.86	146.72	165.27	189.61
214.15	210.72	215	117.86	129.33	148.23	169.96	192.85
208.73	211.29	213.33	118.94	134.23	150.36	172.54	194.97
210.85	214.94	210.8	119.31	133.2	153.19	175.84	185.6
215	212.1	206.28	120	131.5	154.9	171.43	190.14
	Vehicle control	Sham control	SNL80 perse	OUB	OUB + SNL40	OUB + SNL80	OUB + Li60	OUB + SNL80 + Li60
Number of values	6	6	6	6	6	6	6	6
Minimum	205.1	206.5	205.6	115.4	125.4	145	165.3	185.6
25% Percentile	207.8	208.3	206.1	116	127.3	146.3	167	186.5
Median	211.7	211	209.3	118.4	130.4	149.3	170.7	189.9
75% Percentile	214.4	212.8	213.7	119.5	133.5	153.6	173.4	193.4
Maximum	215	214.9	215	120	134.2	154.9	175.8	195
Mean	211.1	210.7	209.8	118	130.3	149.7	170.4	190
Std. Deviation	3.687	2.873	3.854	1.815	3.346	3.815	3.741	3.549
Std. Error	1.505	1.173	1.573	0.7409	1.366	1.558	1.527	1.449
Lower 95% CI of mean	207.2	207.7	205.8	116.1	126.7	145.7	166.5	186.3
Upper 95% CI of mean	214.9	213.8	213.9	119.9	133.8	153.7	174.4	193.7
KS normality test
KS distance	0.1569	0.1634	0.193	0.206	0.1449	0.1532	0.1196	0.153
P value	> 0.10	> 0.10	> 0.10	> 0.10	> 0.10	> 0.10	> 0.10	> 0.10
Passed normality test (alpha=0.05)?	Yes	Yes	Yes	Yes	Yes	Yes	Yes	Yes
P value summary	ns	ns	ns	ns	ns	ns	ns	ns
Sum	1266	1264	1259	707.7	781.5	898.4	1023	1140
Parameter
Table Analyzed	Data 1
Repeated Measures ANOVA
P value	< 0.0001
P value summary	***
Are means signif. different? (P < 0.05)	Yes
Number of groups	8
F	1265
R squared	0.9961
Was the pairing significantly effective?
R squared	0.003778
F	6.744
P value	0.0002
P value summary	***
Is there significant matching? (P < 0.05)	Yes
ANOVA Table	SS	df	MS
Treatment (between columns)	59510	7	8501
Individual (between rows)	226.5	5	45.31
Residual (random)	235.1	35	6.718
Total	59970	47
Tukey's Multiple Comparison Test	Mean Diff.	q	Significant? P < 0.05?	Summary	95% CI of diff
Vehicle control vs Sham control	0.3267	0.3087	No	ns	-4.500 to 5.154
Vehicle control vs SNL80 perse	1.257	1.188	No	ns	-3.570 to 6.084
Vehicle control vs OUB	93.11	87.99	Yes	***	88.29 to 97.94
Vehicle control vs OUB + SNL40	80.81	76.37	Yes	***	75.99 to 85.64
Vehicle control vs OUB + SNL80	61.34	57.96	Yes	***	56.51 to 66.16
Vehicle control vs OUB + Li60	40.64	38.41	Yes	***	35.81 to 45.47
Vehicle control vs OUB + SNL80 + Li60	21.09	19.93	Yes	***	16.26 to 25.91
Sham control vs SNL80 perse	0.93	0.8789	No	ns	-3.897 to 5.757
Sham control vs OUB	92.79	87.69	Yes	***	87.96 to 97.61
Sham control vs OUB + SNL40	80.49	76.06	Yes	***	75.66 to 85.31
Sham control vs OUB + SNL80	61.01	57.66	Yes	***	56.18 to 65.84
Sham control vs OUB + Li60	40.32	38.1	Yes	***	35.49 to 45.14
Sham control vs OUB + SNL80 + Li60	20.76	19.62	Yes	***	15.93 to 25.59
SNL80 perse vs OUB	91.86	86.81	Yes	***	87.03 to 96.68
SNL80 perse vs OUB + SNL40	79.56	75.18	Yes	***	74.73 to 84.38
SNL80 perse vs OUB + SNL80	60.08	56.78	Yes	***	55.25 to 64.91
SNL80 perse vs OUB + Li60	39.39	37.22	Yes	***	34.56 to 44.21
SNL80 perse vs OUB + SNL80 + Li60	19.83	18.74	Yes	***	15.00 to 24.66
OUB vs OUB + SNL40	-12.3	11.62	Yes	***	-17.13 to -7.473
OUB vs OUB + SNL80	-31.78	30.03	Yes	***	-36.60 to -26.95
OUB vs OUB + Li60	-52.47	49.59	Yes	***	-57.30 to -47.64
OUB vs OUB + SNL80 + Li60	-72.03	68.07	Yes	***	-76.86 to -67.20
OUB + SNL40 vs OUB + SNL80	-19.48	18.41	Yes	***	-24.30 to -14.65
OUB + SNL40 vs OUB + Li60	-40.17	37.96	Yes	***	-45.00 to -35.34
OUB + SNL40 vs OUB + SNL80 + Li60	-59.73	56.44	Yes	***	-64.56 to -54.90
OUB + SNL80 vs OUB + Li60	-20.69	19.56	Yes	***	-25.52 to -15.87
OUB + SNL80 vs OUB + SNL80 + Li60	-40.25	38.04	Yes	***	-45.08 to -35.42
OUB + Li60 vs OUB + SNL80 + Li60	-19.56	18.48	Yes	***	-24.38 to -14.73

## Sheet: CoQ10
Vehicle control	Sham control	SNL80 perse	OUA	OUA + SNL40	OUA + SNL80	OUA + Li60	OUA + SNL80 + Li60
8.4	8.21	9.98	2.08	3.1	4.05	5.24	6.08
8.96	8.56	8.12	1.84	3	4.13	5.17	6.17
9.08	8.94	8.49	1.96	3.25	4.28	5.01	6.25
9.5	9.46	8.51	2	3.33	4.37	5.5	6.34
9.78	9.99	9.23	2.1	3.49	4.41	5.39	6.38
10	9.33	9.72	2.2	3.52	4.5	5.48	6.46
	Vehicle control	Sham control	SNL80 perse	OUB	OUB + SNL40	OUB + SNL80	OUB + Li60	OUB + SNL80 + Li60
Number of values	6	6	6	6	6	6	6	6
Minimum	8.4	8.21	8.12	1.84	3	4.05	5.01	6.08
25% Percentile	8.82	8.473	8.398	1.93	3.075	4.11	5.13	6.148
Median	9.29	9.135	8.87	2.04	3.29	4.325	5.315	6.295
75% Percentile	9.835	9.593	9.785	2.125	3.498	4.433	5.485	6.4
Maximum	10	9.99	9.98	2.2	3.52	4.5	5.5	6.46
Mean	9.287	9.082	9.008	2.03	3.282	4.29	5.298	6.28
Std. Deviation	0.5888	0.6453	0.7491	0.1251	0.2078	0.1722	0.1924	0.1407
Std. Error	0.2404	0.2634	0.3058	0.05106	0.08483	0.07029	0.07855	0.05745
Lower 95% CI of mean	8.669	8.404	8.222	1.899	3.064	4.109	5.096	6.132
Upper 95% CI of mean	9.905	9.759	9.794	2.161	3.5	4.471	5.5	6.428
KS normality test
KS distance	0.1414	0.1498	0.247	0.1553	0.1753	0.1789	0.1831	0.1651
P value	> 0.10	> 0.10	> 0.10	> 0.10	> 0.10	> 0.10	> 0.10	> 0.10
Passed normality test (alpha=0.05)?	Yes	Yes	Yes	Yes	Yes	Yes	Yes	Yes
P value summary	ns	ns	ns	ns	ns	ns	ns	ns
Sum	55.72	54.49	54.05	12.18	19.69	25.74	31.79	37.68
Parameter
Table Analyzed	Data 1
Repeated Measures ANOVA
P value	< 0.0001
P value summary	***
Are means signif. different? (P < 0.05)	Yes
Number of groups	8
F	371.5
R squared	0.9867
Was the pairing significantly effective?
R squared	0.008244
F	4.381
P value	0.0033
P value summary	**
Is there significant matching? (P < 0.05)	Yes
ANOVA Table	SS	df	MS
Treatment (between columns)	335.7	7	47.96
Individual (between rows)	2.828	5	0.5657
Residual (random)	4.519	35	0.1291
Total	343.1	47
Tukey's Multiple Comparison Test	Mean Diff.	q	Significant? P < 0.05?	Summary	95% CI of diff
Vehicle control vs Sham control	0.205	1.397	No	ns	-0.4641 to 0.8741
Vehicle control vs SNL80 perse	0.2783	1.897	No	ns	-0.3908 to 0.9475
Vehicle control vs OUB	7.257	49.47	Yes	***	6.588 to 7.926
Vehicle control vs OUB + SNL40	6.005	40.94	Yes	***	5.336 to 6.674
Vehicle control vs OUB + SNL80	4.997	34.06	Yes	***	4.328 to 5.666
Vehicle control vs OUB + Li60	3.988	27.19	Yes	***	3.319 to 4.657
Vehicle control vs OUB + SNL80 + Li60	3.007	20.5	Yes	***	2.338 to 3.676
Sham control vs SNL80 perse	0.07333	0.4999	No	ns	-0.5958 to 0.7425
Sham control vs OUB	7.052	48.07	Yes	***	6.383 to 7.721
Sham control vs OUB + SNL40	5.8	39.54	Yes	***	5.131 to 6.469
Sham control vs OUB + SNL80	4.792	32.66	Yes	***	4.123 to 5.461
Sham control vs OUB + Li60	3.783	25.79	Yes	***	3.114 to 4.452
Sham control vs OUB + SNL80 + Li60	2.802	19.1	Yes	***	2.133 to 3.471
SNL80 perse vs OUB	6.978	47.57	Yes	***	6.309 to 7.647
SNL80 perse vs OUB + SNL40	5.727	39.04	Yes	***	5.058 to 6.396
SNL80 perse vs OUB + SNL80	4.718	32.16	Yes	***	4.049 to 5.387
SNL80 perse vs OUB + Li60	3.71	25.29	Yes	***	3.041 to 4.379
SNL80 perse vs OUB + SNL80 + Li60	2.728	18.6	Yes	***	2.059 to 3.397
OUB vs OUB + SNL40	-1.252	8.533	Yes	***	-1.921 to -0.5825
OUB vs OUB + SNL80	-2.26	15.41	Yes	***	-2.929 to -1.591
OUB vs OUB + Li60	-3.268	22.28	Yes	***	-3.937 to -2.599
OUB vs OUB + SNL80 + Li60	-4.25	28.97	Yes	***	-4.919 to -3.581
OUB + SNL40 vs OUB + SNL80	-1.008	6.874	Yes	***	-1.677 to -0.3392
OUB + SNL40 vs OUB + Li60	-2.017	13.75	Yes	***	-2.686 to -1.348
OUB + SNL40 vs OUB + SNL80 + Li60	-2.998	20.44	Yes	***	-3.667 to -2.329
OUB + SNL80 vs OUB + Li60	-1.008	6.874	Yes	***	-1.677 to -0.3392
OUB + SNL80 vs OUB + SNL80 + Li60	-1.99	13.57	Yes	***	-2.659 to -1.321
OUB + Li60 vs OUB + SNL80 + Li60	-0.9817	6.692	Yes	***	-1.651 to -0.3125

## Sheet: C-II
Vehicle control	Sham control	SNL80 perse	OUA	OUA + SNL40	OUA + SNL80	OUA + Li60	OUA + SNL80 + Li60
11.5	11.63	12	3.1	5.04	6.12	7.23	8
11.6	11.96	11.59	3.42	5.16	6.33	7.16	8.47
11.7	12.09	11.64	3.6	5.22	6.41	7.29	8.14
11.8	12	11.82	3.81	5.37	6.24	7.35	8.08
11.9	11.72	11.95	3.22	5.42	6.19	7.46	8.38
12.1	11.56	12.1	4	5.5	6.5	7.49	8.15
	Vehicle control	Sham control	SNL80 perse	OUB	OUB + SNL40	OUB + SNL80	OUB + Li60	OUB + SNL80 + Li60
Number of values	6	6	6	6	6	6	6	6
Minimum	11.5	11.56	11.59	3.1	5.04	6.12	7.16	8
25% Percentile	11.58	11.61	11.63	3.19	5.13	6.173	7.213	8.06
Median	11.75	11.84	11.89	3.51	5.295	6.285	7.32	8.145
75% Percentile	11.95	12.02	12.03	3.858	5.44	6.433	7.468	8.403
Maximum	12.1	12.09	12.1	4	5.5	6.5	7.49	8.47
Mean	11.77	11.83	11.85	3.525	5.285	6.298	7.33	8.203
Std. Deviation	0.216	0.2183	0.2038	0.3456	0.1741	0.1422	0.1292	0.1821
Std. Error	0.08819	0.08913	0.08319	0.1411	0.07108	0.05805	0.05273	0.07433
Lower 95% CI of mean	11.54	11.6	11.64	3.162	5.102	6.149	7.194	8.012
Upper 95% CI of mean	11.99	12.06	12.06	3.888	5.468	6.448	7.466	8.394
KS normality test
KS distance	0.1212	0.2293	0.1882	0.1446	0.1873	0.1592	0.1762	0.2819
P value	> 0.10	> 0.10	> 0.10	> 0.10	> 0.10	> 0.10	> 0.10	> 0.10
Passed normality test (alpha=0.05)?	Yes	Yes	Yes	Yes	Yes	Yes	Yes	Yes
P value summary	ns	ns	ns	ns	ns	ns	ns	ns
Sum	70.6	70.96	71.1	21.15	31.71	37.79	43.98	49.22
Parameter
Table Analyzed	Data 1
Repeated Measures ANOVA
P value	< 0.0001
P value summary	***
Are means signif. different? (P < 0.05)	Yes
Number of groups	8
F	1770
R squared	0.9972
Was the pairing significantly effective?
R squared	0.00118
F	2.936
P value	0.0257
P value summary	*
Is there significant matching? (P < 0.05)	Yes
ANOVA Table	SS	df	MS
Treatment (between columns)	443.4	7	63.34
Individual (between rows)	0.5255	5	0.1051
Residual (random)	1.253	35	0.03579
Total	445.1	47
Tukey's Multiple Comparison Test	Mean Diff.	q	Significant? P < 0.05?	Summary	95% CI of diff
Vehicle control vs Sham control	-0.06	0.7769	No	ns	-0.4123 to 0.2923
Vehicle control vs SNL80 perse	-0.08333	1.079	No	ns	-0.4356 to 0.2690
Vehicle control vs OUB	8.242	106.7	Yes	***	7.889 to 8.594
Vehicle control vs OUB + SNL40	6.482	83.92	Yes	***	6.129 to 6.834
Vehicle control vs OUB + SNL80	5.468	70.8	Yes	***	5.116 to 5.821
Vehicle control vs OUB + Li60	4.437	57.44	Yes	***	4.084 to 4.789
Vehicle control vs OUB + SNL80 + Li60	3.563	46.14	Yes	***	3.211 to 3.916
Sham control vs SNL80 perse	-0.02333	0.3021	No	ns	-0.3756 to 0.3290
Sham control vs OUB	8.302	107.5	Yes	***	7.949 to 8.654
Sham control vs OUB + SNL40	6.542	84.7	Yes	***	6.189 to 6.894
Sham control vs OUB + SNL80	5.528	71.58	Yes	***	5.176 to 5.881
Sham control vs OUB + Li60	4.497	58.22	Yes	***	4.144 to 4.849
Sham control vs OUB + SNL80 + Li60	3.623	46.91	Yes	***	3.271 to 3.976
SNL80 perse vs OUB	8.325	107.8	Yes	***	7.973 to 8.677
SNL80 perse vs OUB + SNL40	6.565	85	Yes	***	6.213 to 6.917
SNL80 perse vs OUB + SNL80	5.552	71.88	Yes	***	5.199 to 5.904
SNL80 perse vs OUB + Li60	4.52	58.52	Yes	***	4.168 to 4.872
SNL80 perse vs OUB + SNL80 + Li60	3.647	47.21	Yes	***	3.294 to 3.999
OUB vs OUB + SNL40	-1.76	22.79	Yes	***	-2.112 to -1.408
OUB vs OUB + SNL80	-2.773	35.91	Yes	***	-3.126 to -2.421
OUB vs OUB + Li60	-3.805	49.26	Yes	***	-4.157 to -3.453
OUB vs OUB + SNL80 + Li60	-4.678	60.57	Yes	***	-5.031 to -4.326
OUB + SNL40 vs OUB + SNL80	-1.013	13.12	Yes	***	-1.366 to -0.6610
OUB + SNL40 vs OUB + Li60	-2.045	26.48	Yes	***	-2.397 to -1.693
OUB + SNL40 vs OUB + SNL80 + Li60	-2.918	37.78	Yes	***	-3.271 to -2.566
OUB + SNL80 vs OUB + Li60	-1.032	13.36	Yes	***	-1.384 to -0.6794
OUB + SNL80 vs OUB + SNL80 + Li60	-1.905	24.66	Yes	***	-2.257 to -1.553
OUB + Li60 vs OUB + SNL80 + Li60	-0.8733	11.31	Yes	***	-1.226 to -0.5210

## Sheet: C-I
Vehicle control	Sham control	SNL80 perse	OUA	OUA + SNL40	OUA + SNL80	OUA + Li60	OUA + SNL80 + Li60
9.5	9.58	9.86	4.5	5.52	6.52	7.5	9
9.56	9.6	9.72	4.32	5.64	6.69	7.89	8.51
9.64	9.64	9.97	4.26	5.78	6.72	7.64	8.68
9.72	9.76	9.5	4.13	5.94	6.83	7.76	8.73
9.87	9.99	9.61	4.37	5.6	6.91	8	8.97
10	9.81	10	4.44	6	7	7.55	8.62
	Vehicle control	Sham control	SNL80 perse	OUB	OUB + SNL40	OUB + SNL80	OUB + Li60	OUB + SNL80 + Li60
Number of values	6	6	6	6	6	6	6	6
Minimum	9.5	9.58	9.5	4.13	5.52	6.52	7.5	8.51
25% Percentile	9.545	9.595	9.583	4.228	5.58	6.648	7.538	8.593
Median	9.68	9.7	9.79	4.345	5.71	6.775	7.7	8.705
75% Percentile	9.903	9.855	9.978	4.455	5.955	6.933	7.918	8.978
Maximum	10	9.99	10	4.5	6	7	8	9
Mean	9.715	9.73	9.777	4.337	5.747	6.778	7.723	8.752
Std. Deviation	0.1903	0.1565	0.2009	0.1322	0.1934	0.1715	0.1962	0.1953
Std. Error	0.07771	0.06387	0.082	0.05395	0.07894	0.07002	0.08011	0.07973
Lower 95% CI of mean	9.515	9.566	9.566	4.198	5.544	6.598	7.517	8.547
Upper 95% CI of mean	9.915	9.894	9.987	4.475	5.95	6.958	7.929	8.957
KS normality test
KS distance	0.1562	0.2174	0.1654	0.1165	0.2094	0.1366	0.1645	0.2108
P value	> 0.10	> 0.10	> 0.10	> 0.10	> 0.10	> 0.10	> 0.10	> 0.10
Passed normality test (alpha=0.05)?	Yes	Yes	Yes	Yes	Yes	Yes	Yes	Yes
P value summary	ns	ns	ns	ns	ns	ns	ns	ns
Sum	58.29	58.38	58.66	26.02	34.48	40.67	46.34	52.51
Parameter
Table Analyzed	Data 1
Repeated Measures ANOVA
P value	< 0.0001
P value summary	***
Are means signif. different? (P < 0.05)	Yes
Number of groups	8
F	847.9
R squared	0.9941
Was the pairing significantly effective?
R squared	0.001502
F	1.796
P value	0.1393
P value summary	ns
Is there significant matching? (P < 0.05)	No
ANOVA Table	SS	df	MS
Treatment (between columns)	176.8	7	25.25
Individual (between rows)	0.2674	5	0.05349
Residual (random)	1.042	35	0.02978
Total	178.1	47
Tukey's Multiple Comparison Test	Mean Diff.	q	Significant? P < 0.05?	Summary	95% CI of diff
Vehicle control vs Sham control	-0.015	0.2129	No	ns	-0.3364 to 0.3064
Vehicle control vs SNL80 perse	-0.06167	0.8753	No	ns	-0.3830 to 0.2597
Vehicle control vs OUB	5.378	76.34	Yes	***	5.057 to 5.700
Vehicle control vs OUB + SNL40	3.968	56.32	Yes	***	3.647 to 4.290
Vehicle control vs OUB + SNL80	2.937	41.68	Yes	***	2.615 to 3.258
Vehicle control vs OUB + Li60	1.992	28.27	Yes	***	1.670 to 2.313
Vehicle control vs OUB + SNL80 + Li60	0.9633	13.67	Yes	***	0.6420 to 1.285
Sham control vs SNL80 perse	-0.04667	0.6624	No	ns	-0.3680 to 0.2747
Sham control vs OUB	5.393	76.55	Yes	***	5.072 to 5.715
Sham control vs OUB + SNL40	3.983	56.54	Yes	***	3.662 to 4.305
Sham control vs OUB + SNL80	2.952	41.89	Yes	***	2.630 to 3.273
Sham control vs OUB + Li60	2.007	28.48	Yes	***	1.685 to 2.328
Sham control vs OUB + SNL80 + Li60	0.9783	13.89	Yes	***	0.6570 to 1.300
SNL80 perse vs OUB	5.44	77.21	Yes	***	5.119 to 5.761
SNL80 perse vs OUB + SNL40	4.03	57.2	Yes	***	3.709 to 4.351
SNL80 perse vs OUB + SNL80	2.998	42.56	Yes	***	2.677 to 3.320
SNL80 perse vs OUB + Li60	2.053	29.14	Yes	***	1.732 to 2.375
SNL80 perse vs OUB + SNL80 + Li60	1.025	14.55	Yes	***	0.7036 to 1.346
OUB vs OUB + SNL40	-1.41	20.01	Yes	***	-1.731 to -1.089
OUB vs OUB + SNL80	-2.442	34.66	Yes	***	-2.763 to -2.120
OUB vs OUB + Li60	-3.387	48.07	Yes	***	-3.708 to -3.065
OUB vs OUB + SNL80 + Li60	-4.415	62.66	Yes	***	-4.736 to -4.094
OUB + SNL40 vs OUB + SNL80	-1.032	14.64	Yes	***	-1.353 to -0.7103
OUB + SNL40 vs OUB + Li60	-1.977	28.06	Yes	***	-2.298 to -1.655
OUB + SNL40 vs OUB + SNL80 + Li60	-3.005	42.65	Yes	***	-3.326 to -2.684
OUB + SNL80 vs OUB + Li60	-0.945	13.41	Yes	***	-1.266 to -0.6236
OUB + SNL80 vs OUB + SNL80 + Li60	-1.973	28.01	Yes	***	-2.295 to -1.652
OUB + Li60 vs OUB + SNL80 + Li60	-1.028	14.6	Yes	***	-1.350 to -0.7070

## Sheet: C-V
Vehicle control	Sham control	SNL80 perse	OUA	OUA + SNL40	OUA + SNL80	OUA + Li60	OUA + SNL80 + Li60
440.12	448.9	450.5	152.1	202.13	260	335.61	400
445.61	442.53	440.1	167	205.47	280	350	380.24
456.6	445.55	460	170	208.97	265	345.16	384.75
460	454.82	456.7	155.42	218.67	275.4	331.25	389.49
458.42	459	442.23	168.9	210.25	270	342.75	394.27
441.36	456.1	445.86	150.23	215.43	263.48	348.47	397.53
	Vehicle control	Sham control	SNL80 perse	OUB	OUB + SNL40	OUB + SNL80	OUB + Li60	OUB + SNL80 + Li60
Number of values	6	6	6	6	6	6	6	6
Minimum	440.1	442.5	440.1	150.2	202.1	260	331.3	380.2
25% Percentile	441.1	444.8	441.7	151.6	204.6	262.6	334.5	383.6
Median	451.1	451.9	448.2	161.2	209.6	267.5	344	391.9
75% Percentile	458.8	456.8	457.5	169.2	216.2	276.6	348.9	398.1
Maximum	460	459	460	170	218.7	280	350	400
Mean	450.4	451.2	449.2	160.6	210.2	269	342.2	391
Std. Deviation	9.003	6.486	7.964	8.998	6.133	7.621	7.383	7.635
Std. Error	3.675	2.648	3.251	3.673	2.504	3.111	3.014	3.117
Lower 95% CI of mean	440.9	444.3	440.9	151.2	203.7	261	334.5	383
Upper 95% CI of mean	459.8	458	457.6	170.1	216.6	277	350	399.1
KS normality test
KS distance	0.2562	0.2142	0.164	0.2612	0.1604	0.1992	0.196	0.1635
P value	> 0.10	> 0.10	> 0.10	> 0.10	> 0.10	> 0.10	> 0.10	> 0.10
Passed normality test (alpha=0.05)?	Yes	Yes	Yes	Yes	Yes	Yes	Yes	Yes
P value summary	ns	ns	ns	ns	ns	ns	ns	ns
Sum	2702	2707	2695	963.7	1261	1614	2053	2346
Parameter
Table Analyzed	Data 1
Repeated Measures ANOVA
P value	< 0.0001
P value summary	***
Are means signif. different? (P < 0.05)	Yes
Number of groups	8
F	1338
R squared	0.9963
Was the pairing significantly effective?
R squared	0.0005203
F	0.9791
P value	0.4442
P value summary	ns
Is there significant matching? (P < 0.05)	No
ANOVA Table	SS	df	MS
Treatment (between columns)	558900	7	79850
Individual (between rows)	292	5	58.41
Residual (random)	2088	35	59.66
Total	561300	47
Tukey's Multiple Comparison Test	Mean Diff.	q	Significant? P < 0.05?	Summary	95% CI of diff
Vehicle control vs Sham control	-0.7983	0.2532	No	ns	-15.18 to 13.59
Vehicle control vs SNL80 perse	1.12	0.3552	No	ns	-13.26 to 15.50
Vehicle control vs OUB	289.7	91.89	Yes	***	275.4 to 304.1
Vehicle control vs OUB + SNL40	240.2	76.17	Yes	***	225.8 to 254.6
Vehicle control vs OUB + SNL80	181.4	57.52	Yes	***	167.0 to 195.8
Vehicle control vs OUB + Li60	108.1	34.3	Yes	***	93.76 to 122.5
Vehicle control vs OUB + SNL80 + Li60	59.3	18.81	Yes	***	44.92 to 73.69
Sham control vs SNL80 perse	1.918	0.6084	No	ns	-12.47 to 16.30
Sham control vs OUB	290.5	92.14	Yes	***	276.2 to 304.9
Sham control vs OUB + SNL40	241	76.43	Yes	***	226.6 to 255.4
Sham control vs OUB + SNL80	182.2	57.77	Yes	***	167.8 to 196.6
Sham control vs OUB + Li60	108.9	34.55	Yes	***	94.56 to 123.3
Sham control vs OUB + SNL80 + Li60	60.1	19.06	Yes	***	45.72 to 74.49
SNL80 perse vs OUB	288.6	91.53	Yes	***	274.2 to 303.0
SNL80 perse vs OUB + SNL40	239.1	75.82	Yes	***	224.7 to 253.5
SNL80 perse vs OUB + SNL80	180.3	57.16	Yes	***	165.9 to 194.6
SNL80 perse vs OUB + Li60	107	33.94	Yes	***	92.64 to 121.4
SNL80 perse vs OUB + SNL80 + Li60	58.19	18.45	Yes	***	43.80 to 72.57
OUB vs OUB + SNL40	-49.55	15.71	Yes	***	-63.93 to -35.16
OUB vs OUB + SNL80	-108.4	34.37	Yes	***	-122.8 to -93.99
OUB vs OUB + Li60	-181.6	57.59	Yes	***	-196.0 to -167.2
OUB vs OUB + SNL80 + Li60	-230.4	73.08	Yes	***	-244.8 to -216.1
OUB + SNL40 vs OUB + SNL80	-58.83	18.66	Yes	***	-73.21 to -44.44
OUB + SNL40 vs OUB + Li60	-132.1	41.88	Yes	***	-146.4 to -117.7
OUB + SNL40 vs OUB + SNL80 + Li60	-180.9	57.37	Yes	***	-195.3 to -166.5
OUB + SNL80 vs OUB + Li60	-73.23	23.22	Yes	***	-87.61 to -58.84
OUB + SNL80 vs OUB + SNL80 + Li60	-122.1	38.71	Yes	***	-136.5 to -107.7
OUB + Li60 vs OUB + SNL80 + Li60	-48.84	15.49	Yes	***	-63.22 to -34.46
